# Supplementary material for: Molecular recognition of organophosphorus compounds in water and inhibition of their toxicity to acetylcholinesterase
Source: Royal Society of Chemistry journal article supplement (doi:10.1039/c9cc04603h), 2019-01-01
Supplement: c9cc04603h1.pdf [file c9cc04603h1.pdf]

## Electronic Supplementary Information

# Molecular Recognition of Organophosphorus Compounds in Water and Inhibition of Their Toxicity to Acetylcholinesterase

Wei-Er Liu,<sup>ab</sup> Zhao Chen,<sup>b</sup> Liu-Pan Yang,<sup>b</sup> Ho Yu Au-Yeung,<sup>\*a</sup> and Wei Jiang <sup>\*b</sup>

<sup>a</sup> *Department of Chemistry, The University of Hong Kong, Hong Kong, China.  
E-mail: [hoyuay@hku.hk](mailto:hoyuay@hku.hk)*

<sup>b</sup> *Shenzhen Grubbs Institute and Department of Chemistry, Southern University of Science and Technology, Shenzhen, 518055, China. E-mail: [jiangw@sustech.edu.cn](mailto:jiangw@sustech.edu.cn)*

## Table of Contents

|                                                                 |     |
|-----------------------------------------------------------------|-----|
| 1. Experimental Section                                         | S2  |
| 2. <sup>1</sup> H, <sup>31</sup> P NMR Spectra of the Complexes | S3  |
| 3. Binding Constants Determined by NMR Titrations               | S10 |
| 4. 9:1 H <sub>2</sub> O/D <sub>2</sub> O Titration Experiments  | S24 |
| 5. Fluorescence Titration Experiments                           | S25 |
| 6. In vitro Enzymatic Experiments                               | S26 |
| 7. Binding between AICI and 1a                                  | S32 |

## 1. Experimental Section

**1.1 General.** All the reagents involved in this research were commercially available and used without further purification unless otherwise noted. Solvents were either employed as purchased or dried prior to use by standard laboratory procedures.  $^1\text{H}$  NMR and  $^{31}\text{P}$  NMR spectra were recorded on Bruker Avance-400M or 500M NMR spectrometers. All chemical shifts are reported in *ppm* with methanesulfonic acid as the internal standard. Fluorescence spectra (FL) were obtained on a Shimadzu RF-5301pc spectrometer. UV-vis absorption spectra were obtained on a Hitachi U-2600 UV-vis spectrophotometer. Molecular simulations were performed at the Semi-Empirical PM6 level of theory by using Spartan'14 (Wavefunction, Inc.). The synthesis of **1a** and **1b** has been reported.<sup>1</sup>

**1.2 Isothermal titration calorimetry, ITC.** Titration experiments were carried out in deionized water at 25 °C on a VP-ITC instrument. In a typical experiment, a 1.4338 mL solution of **1a** was placed in the sample cell at a concentration of  $1.0 \times 10^{-4}$  M, and 292  $\mu\text{L}$  of a solution of **7** ( $3.0 \times 10^{-3}$  M) was in the injection syringe. The titrations were consisted of a 2  $\mu\text{L}$  injection and followed 28 consecutive injections of 10  $\mu\text{L}$  each with a 210 s interval between injections. Heats of dilution, measured by titration of **7** into the sample cell with blank solvent, were subtracted from each data set. All solutions were degassed prior to titration. The data were analysed using the instrumental internal software package and fitted by “one binding site” model. Errors are smaller than  $\pm 10\%$ .

---

<sup>1</sup> G. B. Huang, S. H. Wang, H. Ke, L. P. Yang and W. Jiang, *J. Am. Chem. Soc.*, 2016, **138**, 14550.

## 2. $^1\text{H}$ , $^{31}\text{P}$ NMR Spectra of the Complexes

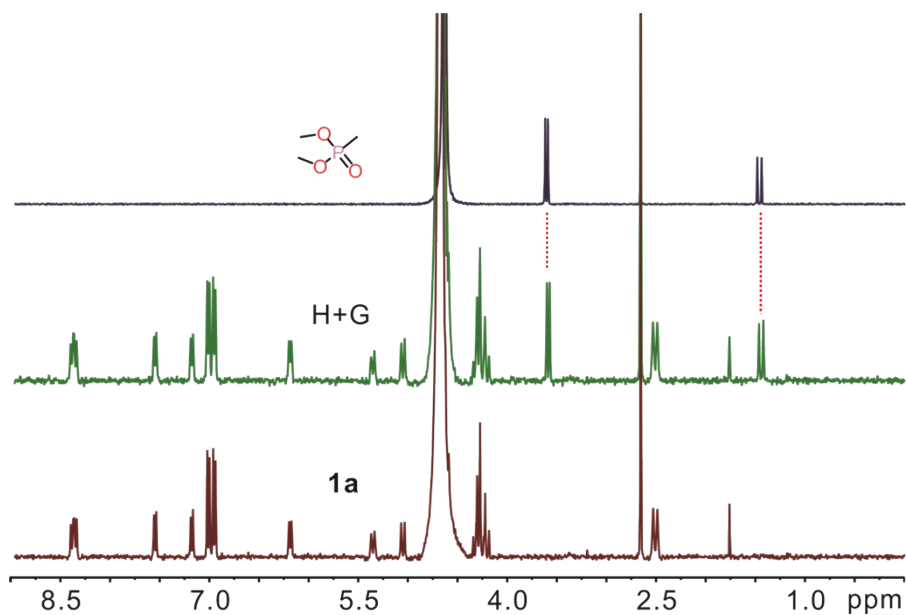

**Fig. S1**  $^1\text{H}$  NMR spectra (400 MHz,  $\text{D}_2\text{O}$ ,  $2.0 \times 10^{-4}$  M, 298 K) of (a) Guest **2**, (c) **1a** and (b) their equimolar mixture. The protons of the guest slightly shifted upfield, suggesting the complexation between **2** and **1a**.

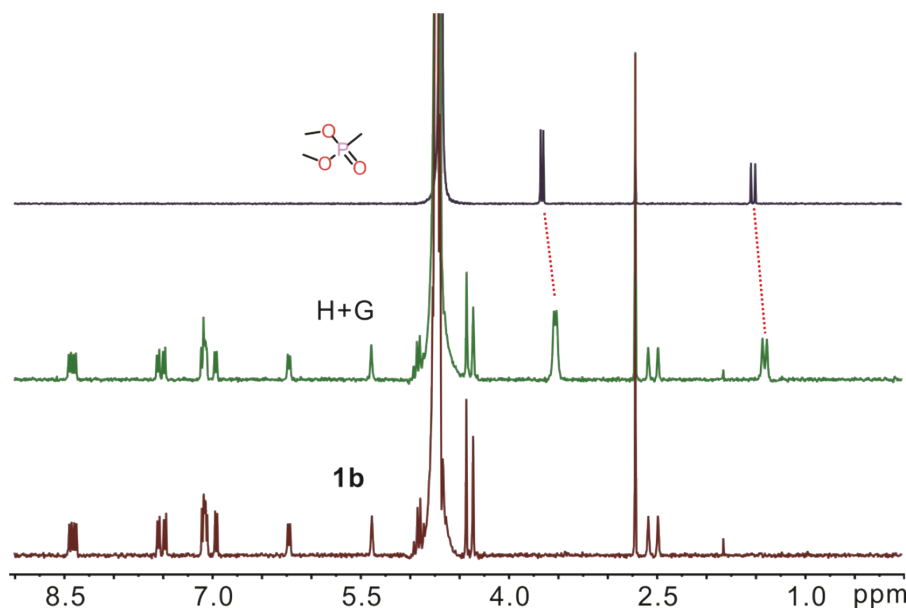

**Fig. S2**  $^1\text{H}$  NMR spectra (400 MHz,  $\text{D}_2\text{O}$ ,  $2.0 \times 10^{-4}$  M, 298 K) of (a) Guest **2**, (c) **1b** and (b) their equimolar mixture. The protons of guest shifted upfield and became broadened, suggesting the complexation between **2** and **1b**.

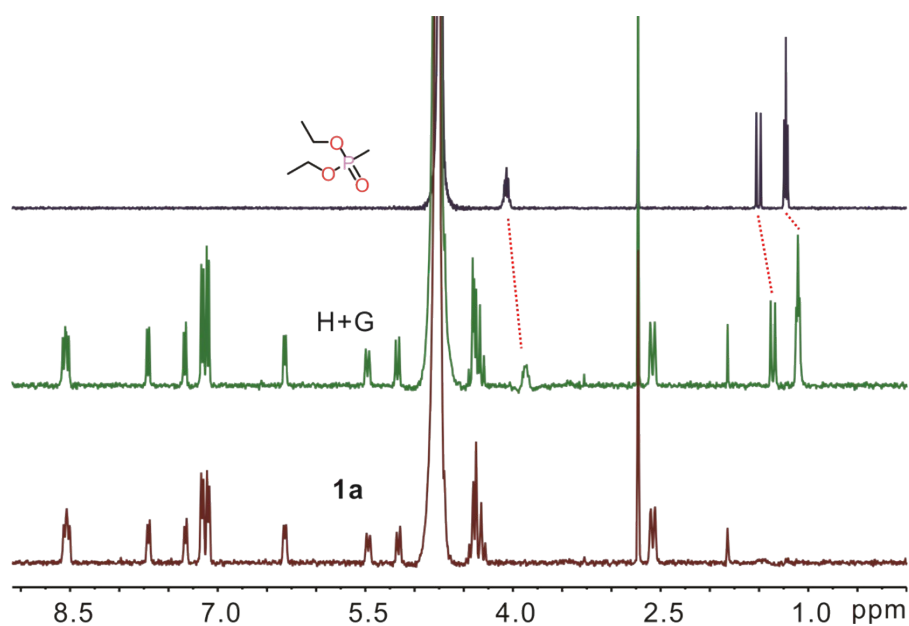

**Fig. S3**  $^1\text{H}$  NMR spectra (400 MHz,  $\text{D}_2\text{O}$ ,  $2.0 \times 10^{-4}$  M, 298 K) of (a) Guest **3**, (c) **1a** and (b) their equimolar mixture. In the host-guest mixture, the protons of the guest shifted upfield and became broadened, suggesting the complexation between **3** and **1a**.

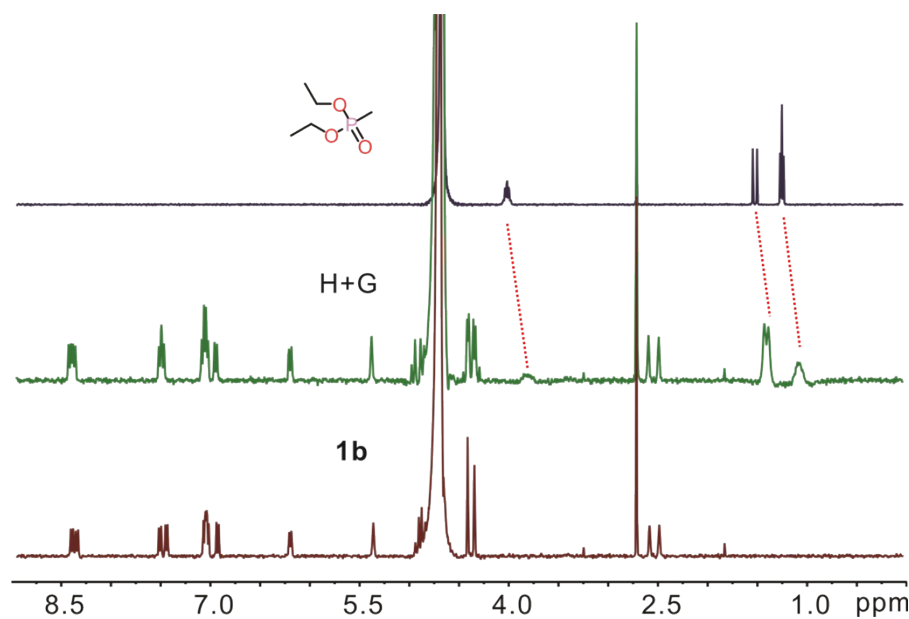

**Fig. S4**  $^1\text{H}$  NMR spectra (400 MHz,  $\text{D}_2\text{O}$ ,  $2.0 \times 10^{-4}$  M, 298 K) of (a) Guest **3**, (c) **1b** and (b) their equimolar mixture. In the host-guest mixture, the protons of the guest shifted upfield and became broadened, suggesting the complexation between **3** and **1b**.



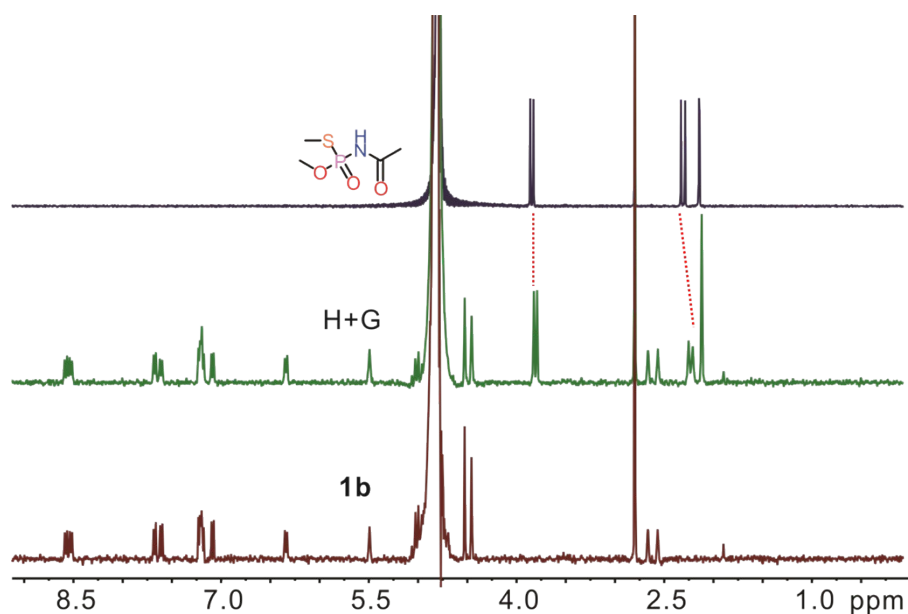

**Fig. S5** <sup>1</sup>H NMR spectra (400 MHz, D<sub>2</sub>O, 2.0×10<sup>-4</sup> M, 298 K) of (a) Guest **4** (c) **1b** and (b) their equimolar mixture. In the host-guest mixture, the protons of the guest shifted upfield, suggesting the complexation between **4** and **1b**.

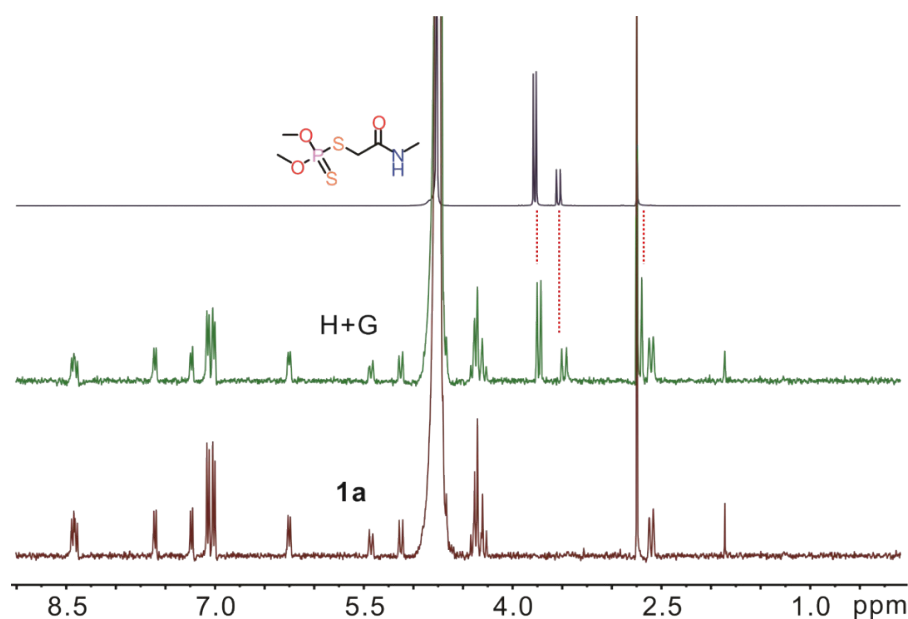

**Fig. S6** <sup>1</sup>H NMR spectra (400 MHz, D<sub>2</sub>O, 2.0×10<sup>-4</sup> M, 298 K) of (a) Guest **5**, (c) **1a** and (b) their equimolar mixture. In the host-guest mixture, the protons of the guest slightly shifted upfield, suggesting the complexation between **5** and **1a**.

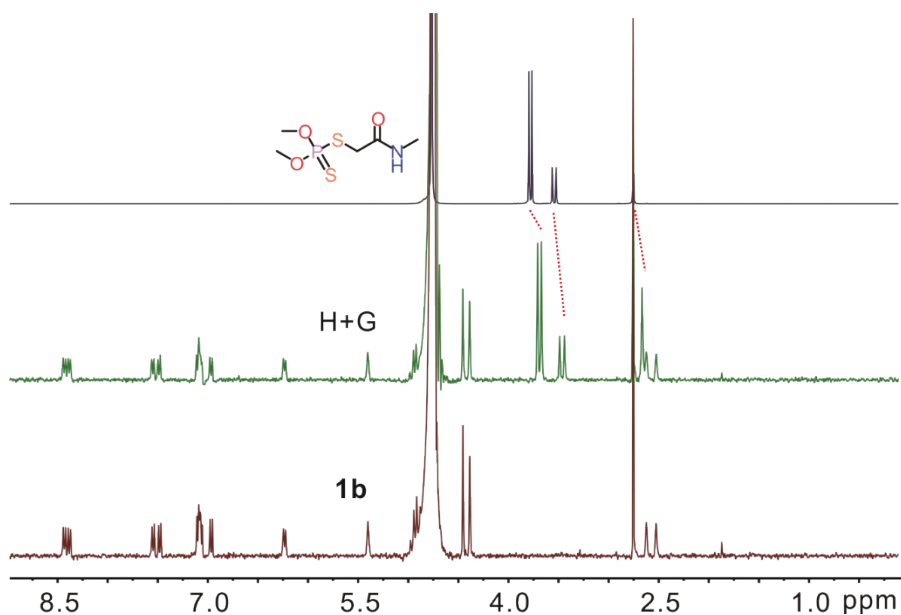

**Fig. S7** <sup>1</sup>H NMR spectra (400 MHz, D<sub>2</sub>O, 2.0×10<sup>-4</sup> M, 298 K) of (a) Guest **5**, (c) **1b** and (b) their equimolar mixture. In the host-guest mixture, the protons of the guest shifted upfield, suggesting the complexation between **5** and **1b**.

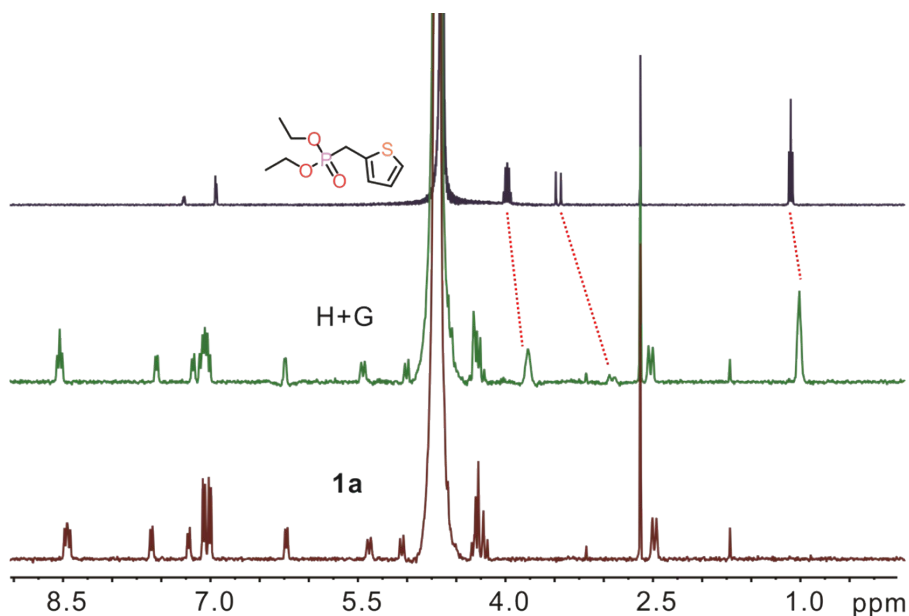

**Fig. S8** <sup>1</sup>H NMR spectra (400 MHz, D<sub>2</sub>O, 2.0×10<sup>-4</sup> M, 298 K) of (a) Guest **6**, (c) **1a** and (b) their equimolar mixture. In the host-guest mixture, the protons of the guest shifted upfield and become broaden, suggesting the formation of the complex between **6** and **1a**.

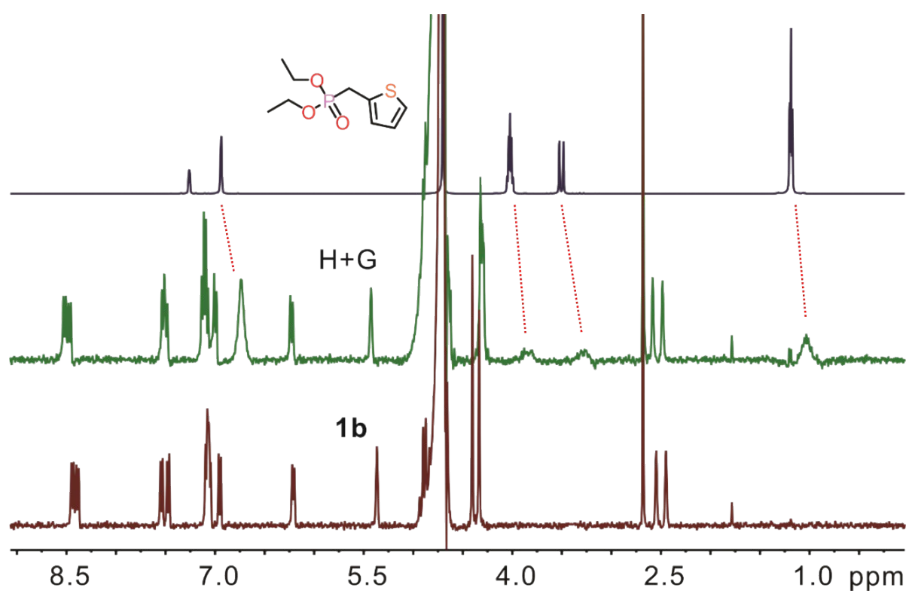

**Fig. S9** <sup>1</sup>H NMR spectra (400 MHz, D<sub>2</sub>O, 2.0×10<sup>-4</sup> M, 298 K) of (a) Guest **6**, (c)**1b**, and (b) their equimolar mixture. In the host-guest mixture, the protons of the guest shifted upfield and become broaden, suggesting the formation of the complex between **6** and **1b**.

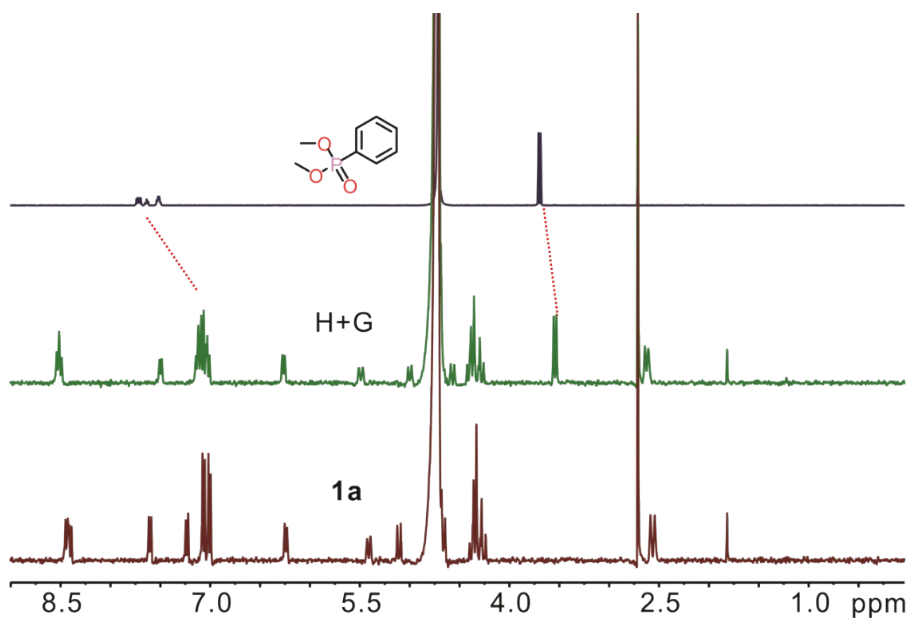

**Fig. S10** <sup>1</sup>H NMR spectra (400 MHz, D<sub>2</sub>O, 2.0×10<sup>-4</sup> M, 298 K) of (a) Guest **7**, (c) **1a** and (b) their equimolar mixture. In the host-guest mixture, the protons of the guest shifted upfield and become broaden, suggesting the complexation between **7** and **1a**.

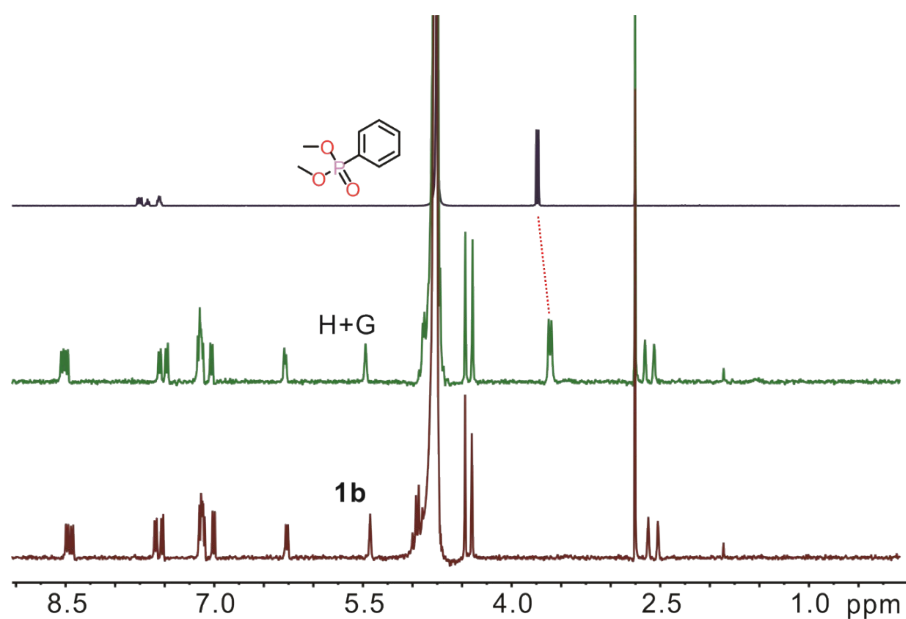

**Fig. S11**  $^1\text{H}$  NMR spectra (400 MHz,  $\text{D}_2\text{O}$ ,  $2.0 \times 10^{-4}$  M, 298 K) of (a) Guest **7**, (c) **1b** and (b) their equimolar mixture. In the host-guest mixture, the protons of the guest shifted upfield and become broaden, suggesting the complexation between **7** and **1b**.

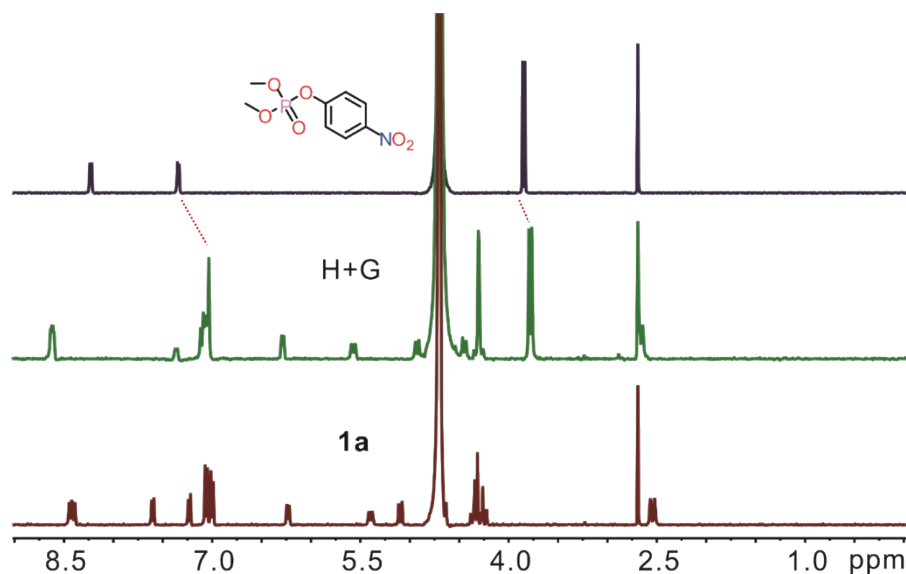

**Fig. S12**  $^1\text{H}$  NMR spectra (400 MHz,  $\text{D}_2\text{O}$ ,  $2.0 \times 10^{-4}$  M, 298 K) of (a) Guest **8**, (c) **1a** and (b) their equimolar mixture. In the host-guest mixture, the protons of the guest shifted upfield, and the protons of **1a** largely shifted downfield, suggesting the complexation between **8** and **1a**.

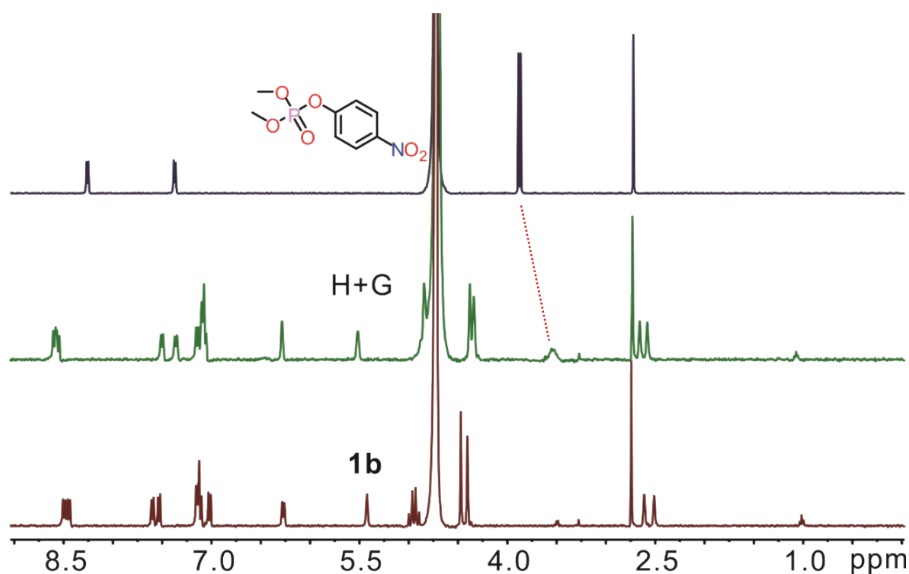

**Fig. S13**  $^1\text{H}$  NMR spectra (400 MHz,  $\text{D}_2\text{O}$ ,  $2.0 \times 10^{-4}$  M, 298 K) of (a) Guest **8**, (c) **1b** and (b) their equimolar mixture. The protons of the guest became significantly broadened and rolled into the baseline, while the protons of **1b** shifted downfield, suggesting the complexation between **8** and **1b**.

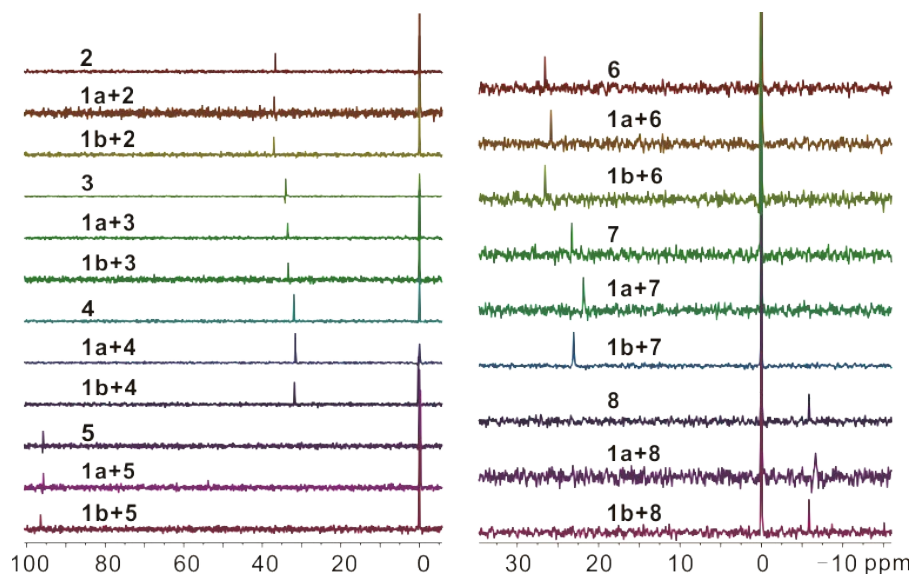

**Fig. S14**  $^{31}\text{P}$  NMR spectra (162 MHz,  $\text{D}_2\text{O}$ ,  $5.0 \times 10^{-4}$  M, 298 K) of Guests **2-8** and their equimolar mixture with **1a** and **1b** (with  $1.0 \times 10^{-3}$  M  $\text{Na}_2\text{HPO}_4$  as the internal standard). When compared to free guests, the shifts of the phosphorus in the complexes were observed, supporting the complex formation.

#### 4. Binding Constants Determined by NMR Titrations

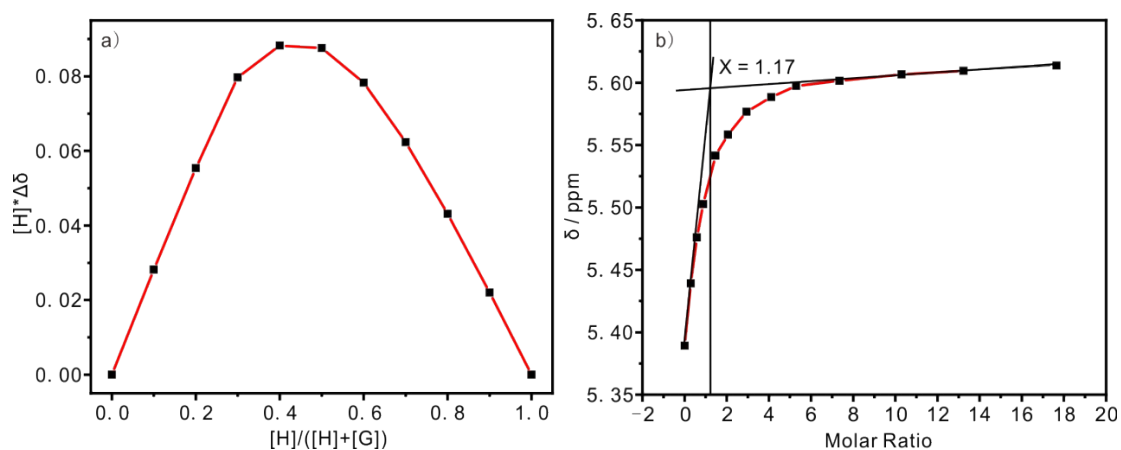

**Fig. S15** a) Job's plot obtained by plotting the chemical shift change (*ppm*) of the Host's proton (7+7') in  $^1\text{H}$  NMR spectra by varying the ratio of the host and the guest against the mole fraction of **1a**. The total concentration of the host and the guest is fixed:  $[7] + [1a] = 1.0 \times 10^{-3}$  M. b) Molar ratio titration plot of **7** and **1a**. These experiments support the 1:1 binding stoichiometry between **7** and **1a** in the 1:1 mixture of  $\text{D}_2\text{O}$ .

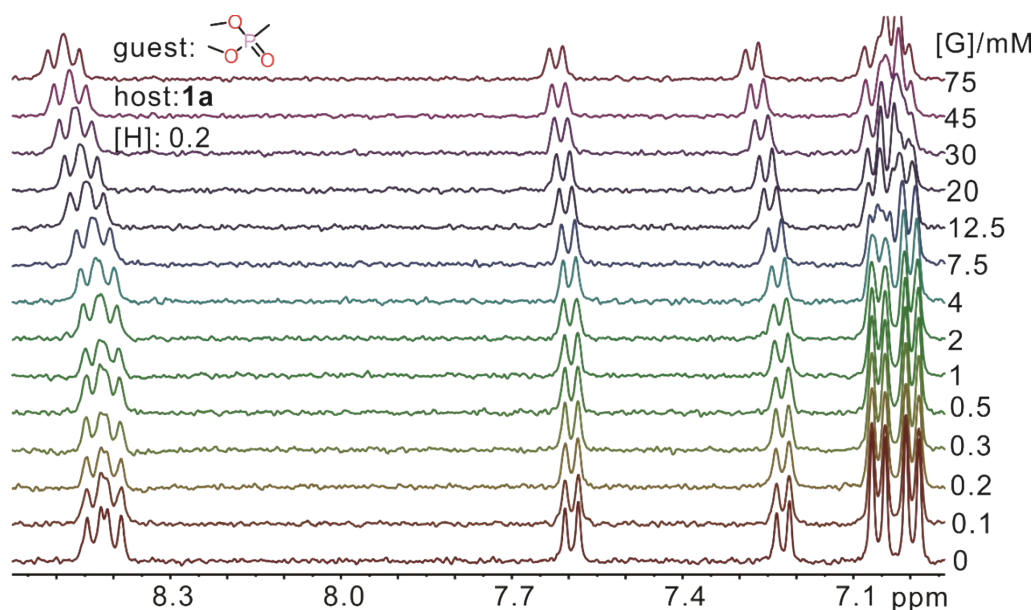

**Fig. S16** Partial  $^1\text{H}$  NMR spectra (400 MHz,  $\text{D}_2\text{O}$ , 298 K) of **1a** ( $2.0 \times 10^{-4}$  M) titrated by **2**. From bottom to top, the concentrations of **2** are in the range of  $0 \sim 7.5 \times 10^{-2}$  M. Protons (1) of **1a** were monitored for the calculation of binding constants. Nonlinear curve-fitting method was then used to obtain the association constant through the following equation by Origin 2018:

$$\delta = \delta_0 + \Delta\delta (0.5/[H]_0) ([G] + [H]_0 + 1/K - (([G] + [H]_0 + 1/K)^2 - 4[H]_0[G])^{0.5})$$

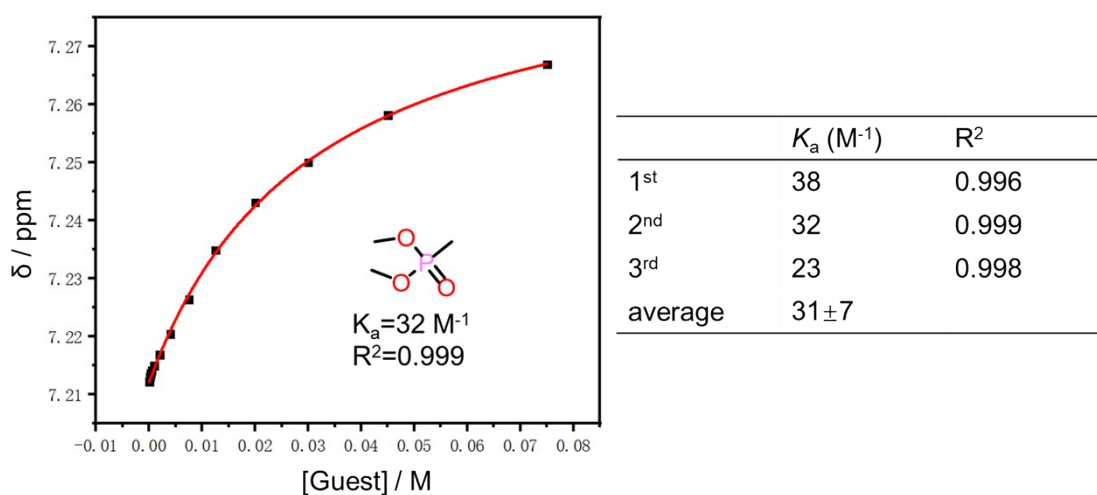

**Fig. S17** Non-linear curve-fitting and association constant for the complexation between **1a** and **2** in  $\text{D}_2\text{O}$  at 298 K.

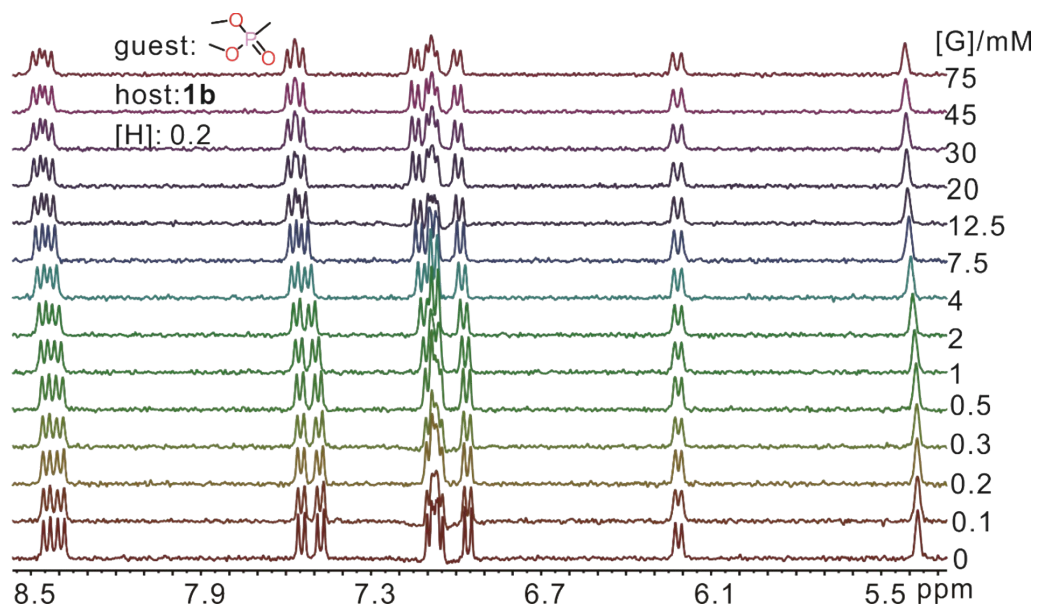

**Fig. S18** Partial  $^1\text{H}$  NMR spectra (400 MHz,  $\text{D}_2\text{O}$ , 298 K) of **1b** ( $2.0 \times 10^{-4}$  M) titrated by **2**. From bottom to top, the concentrations of **2** are in the range of  $0 \sim 7.5 \times 10^{-2}$  M. Protons ( $7+7'$ ) of **1b** were monitored for the calculation of binding constants.

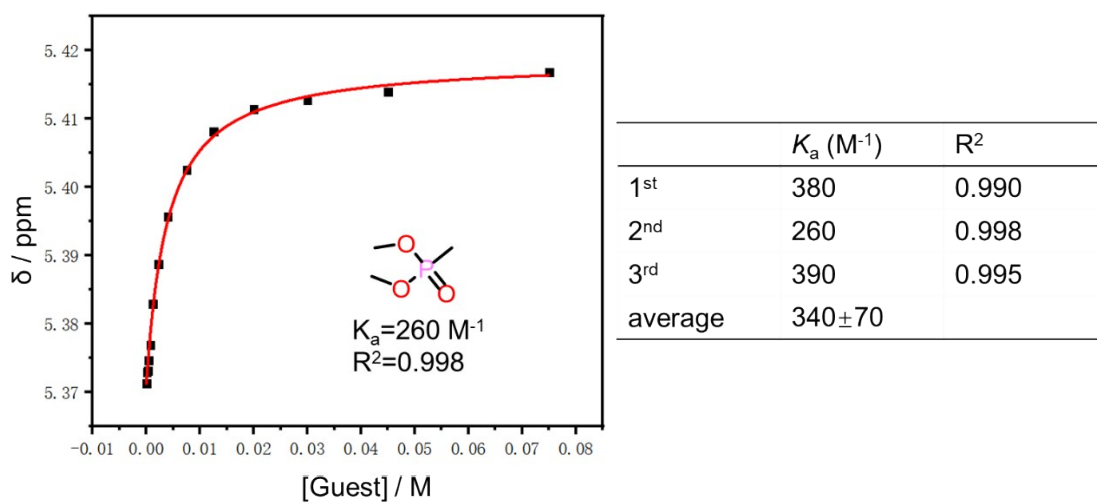

**Fig. S19** Non-linear curve-fitting and association constant for the complexation between **1b** and **2** in  $\text{D}_2\text{O}$  at 298 K.



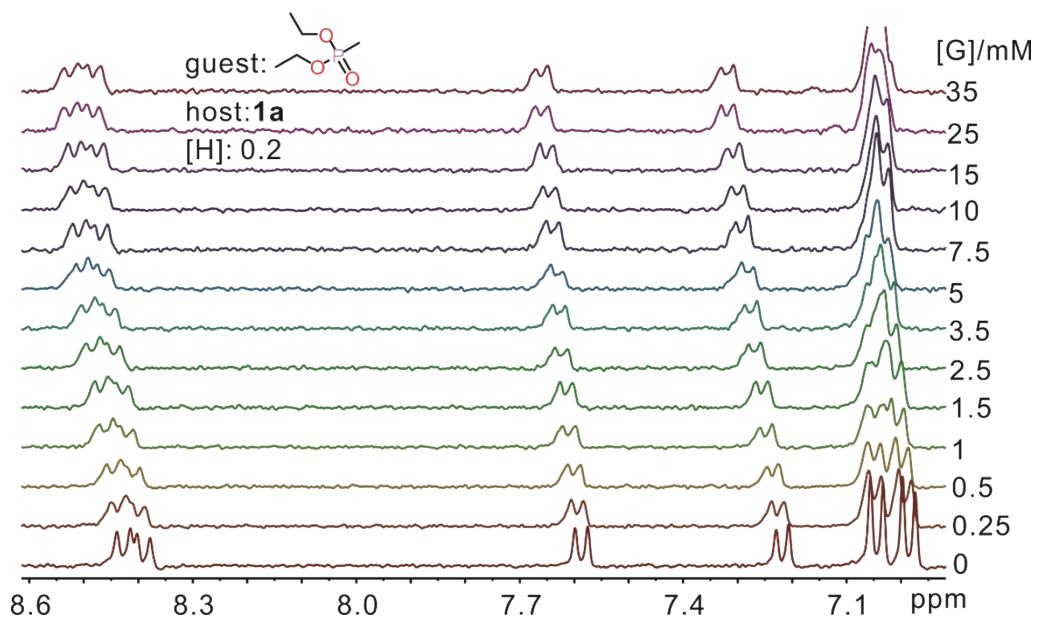

**Fig. S20** Partial  $^1\text{H}$  NMR spectra (400 MHz,  $\text{D}_2\text{O}$ , 298 K) of **1a** ( $2.0 \times 10^{-4}$  M) titrated by **3**. From bottom to top, the concentrations of **3** are in the range of  $0 \sim 3.5 \times 10^{-2}$  M. Protons ( $4+4'$ ) of **1a** were monitored for the calculation of binding constants.

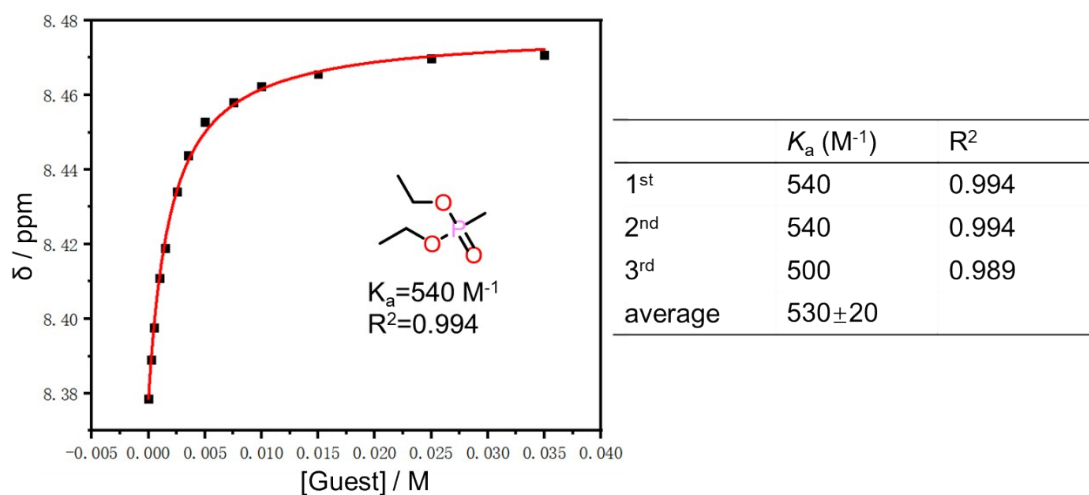

**Fig. S21** Non-linear curve-fitting and association constant for the complexation between **1a** and **3** in  $\text{D}_2\text{O}$  at 298 K.

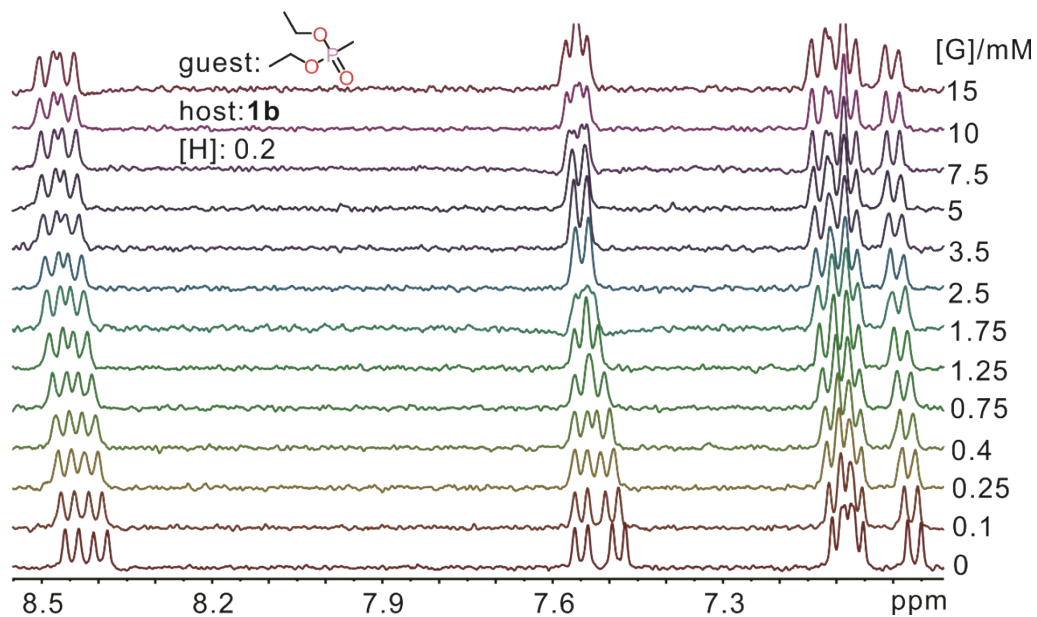

**Fig. S22** Partial  $^1\text{H}$  NMR spectra (400 MHz,  $\text{D}_2\text{O}$ , 298 K) of **1b** ( $2.0 \times 10^{-4}$  M) titrated by **3**. From bottom to top, the concentrations of **3** are in the range of  $0 \sim 1.5 \times 10^{-2}$  M. Protons (4+4') of **1b** were monitored for the calculation of binding constants.

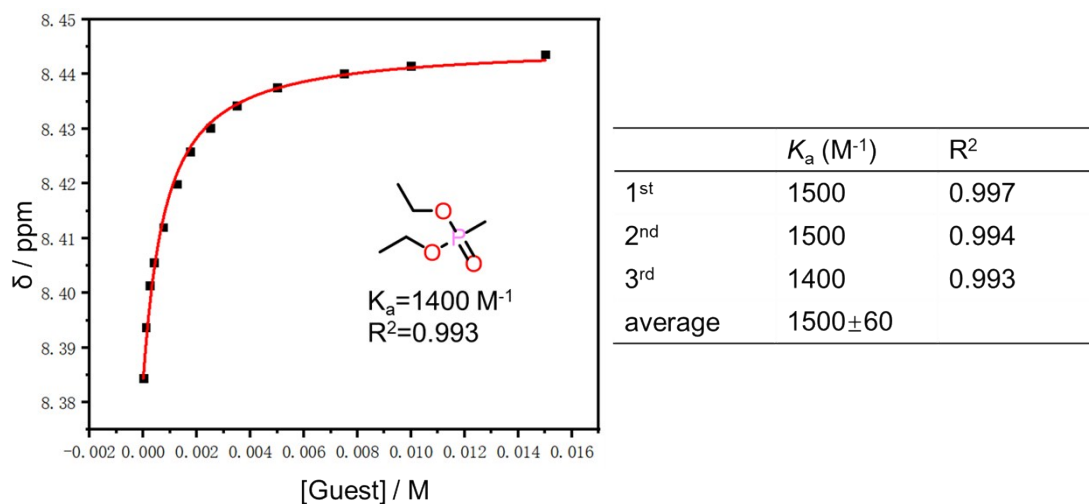

**Fig. S23** Non-linear curve-fitting and association constant for the complexation between **1b** and **3** in  $\text{D}_2\text{O}$  at 298 K.

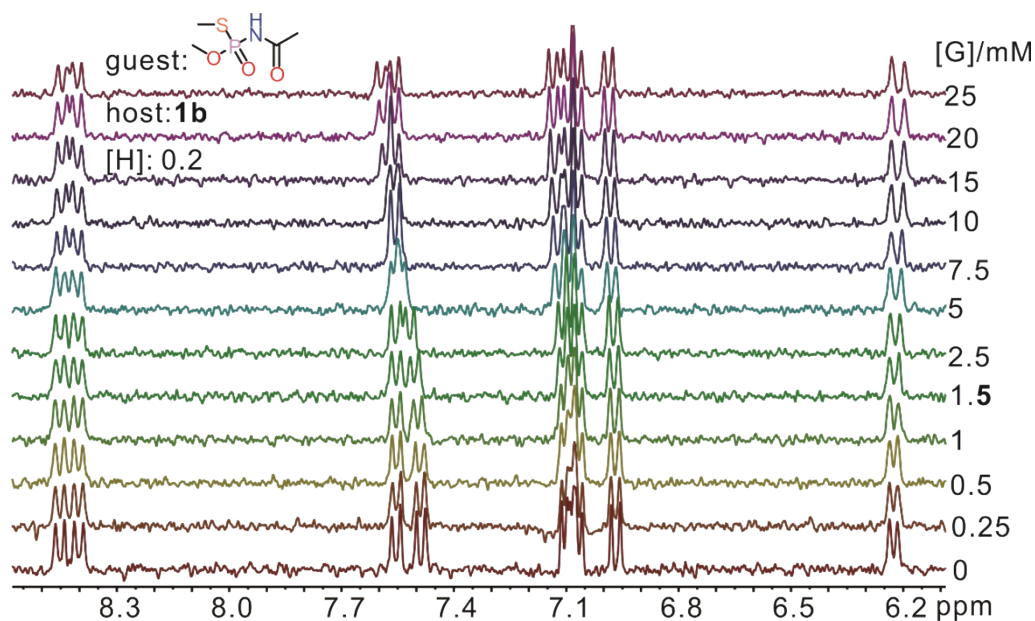

**Fig. S24** Partial  $^1\text{H}$  NMR spectra (400 MHz,  $\text{D}_2\text{O}$ , 298 K) of **1b** ( $2.0 \times 10^{-4}$  M) titrated by **4**. From bottom to top, the concentrations of **4** are in the range of  $0 \sim 2.5 \times 10^{-2}$  M. Protons ( $5+5'$ ) of **1b** were monitored for the calculation of binding constants.

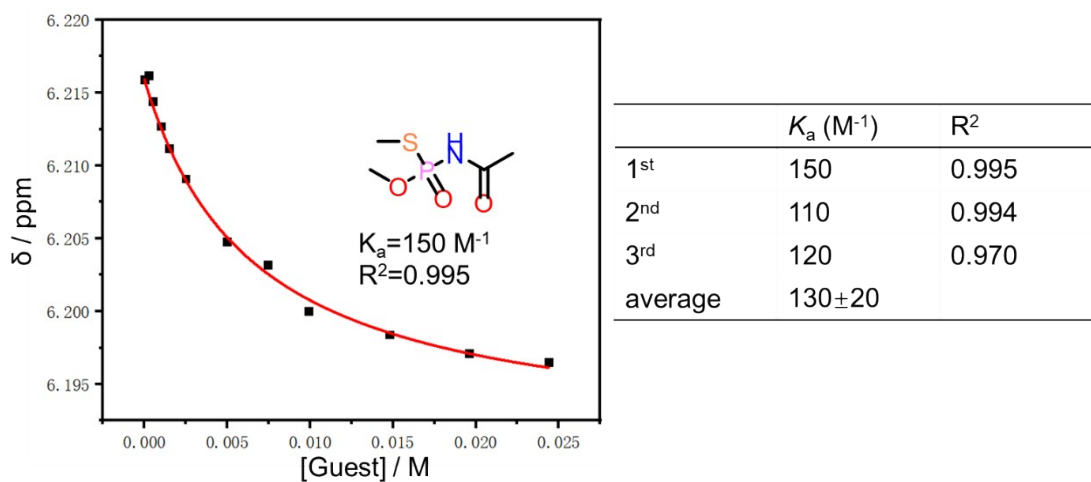

**Fig. S25** Non-linear curve-fitting and association constant for the complexation between **1b** and **4** in  $\text{D}_2\text{O}$  at 298 K.

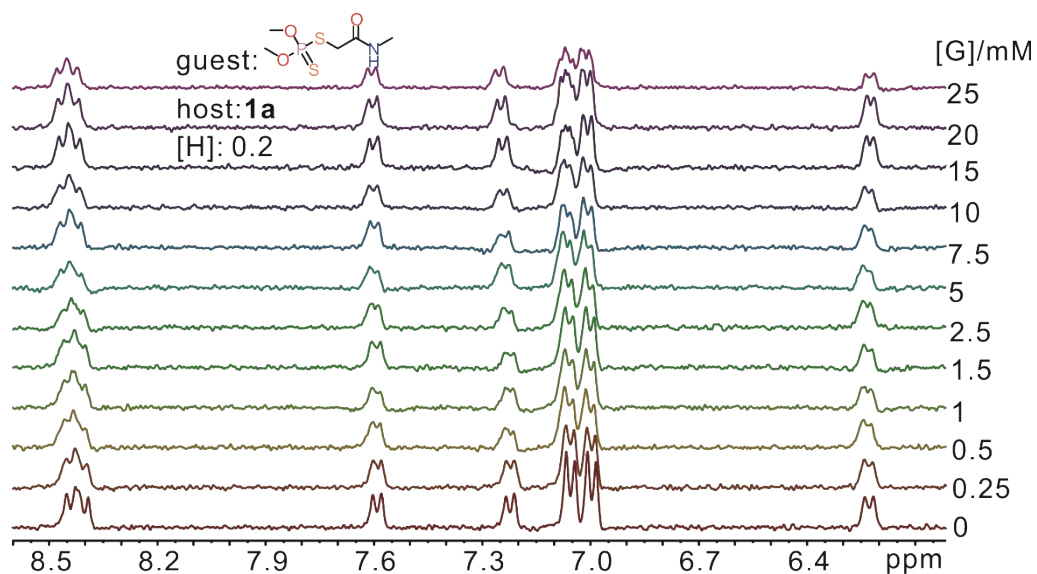

**Fig. S26** Partial  $^1\text{H}$  NMR spectra (400 MHz,  $\text{D}_2\text{O}$ , 298 K) of **1a** ( $2.0 \times 10^{-4}$  M) titrated by **5**. From bottom to top, the concentrations of **5** are in the range of  $0 \sim 2.5 \times 10^{-2}$  M. Protons ( $4+4'$ ) of **1a** were monitored for the calculation of binding constants.

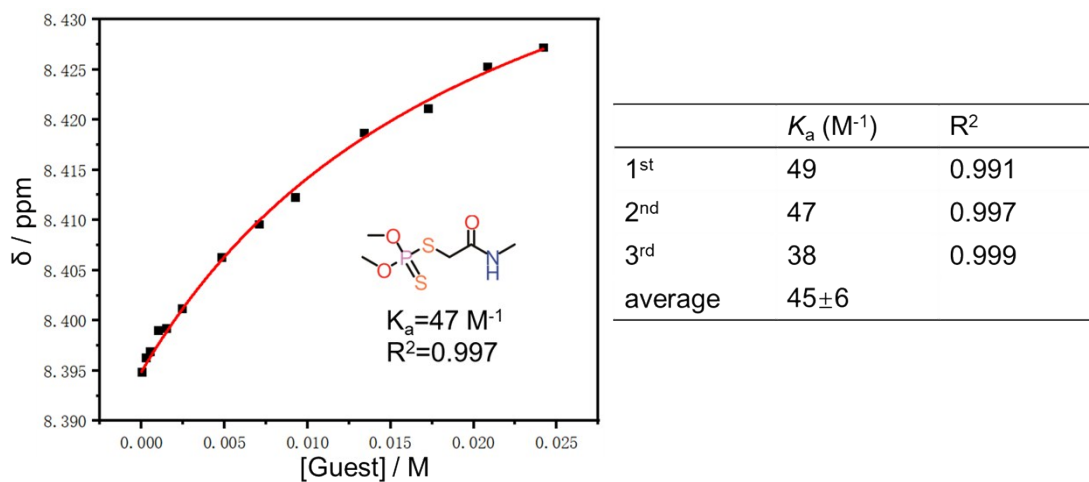

**Fig. S27** Non-linear curve-fitting and association constant for the complexation between **1a** and **5** in  $\text{D}_2\text{O}$  at 298 K.

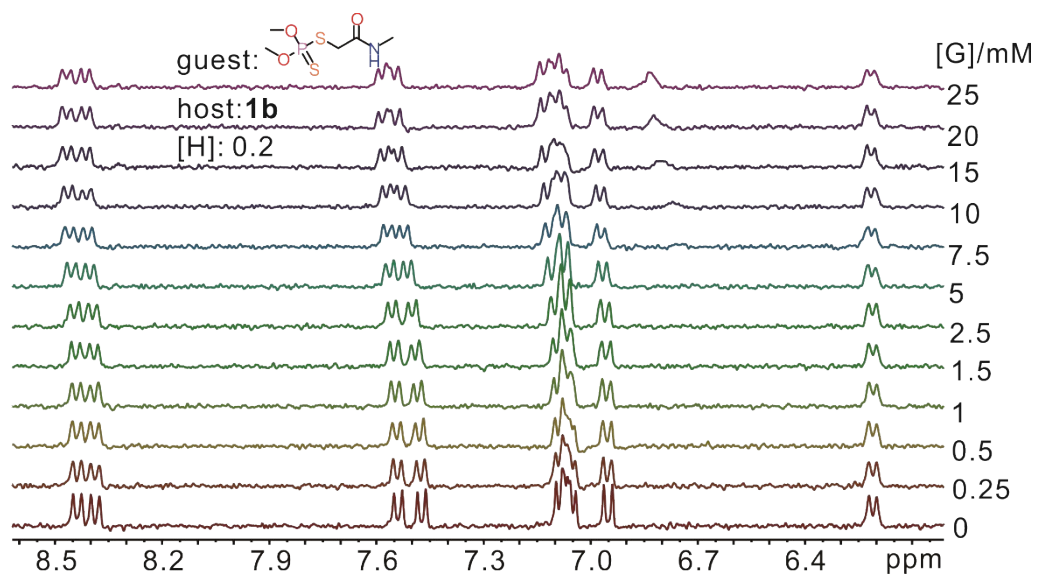

**Fig. S28** Partial  $^1\text{H}$  NMR spectra (400 MHz,  $\text{D}_2\text{O}$ , 298 K) of **1b** ( $2.0 \times 10^{-4}$  M) titrated by **5**. From bottom to top, the concentrations of **5** are in the range of  $0 \sim 2.5 \times 10^{-2}$  M mM. Protons (1+2') of **1b** were monitored for the calculation of binding constants.

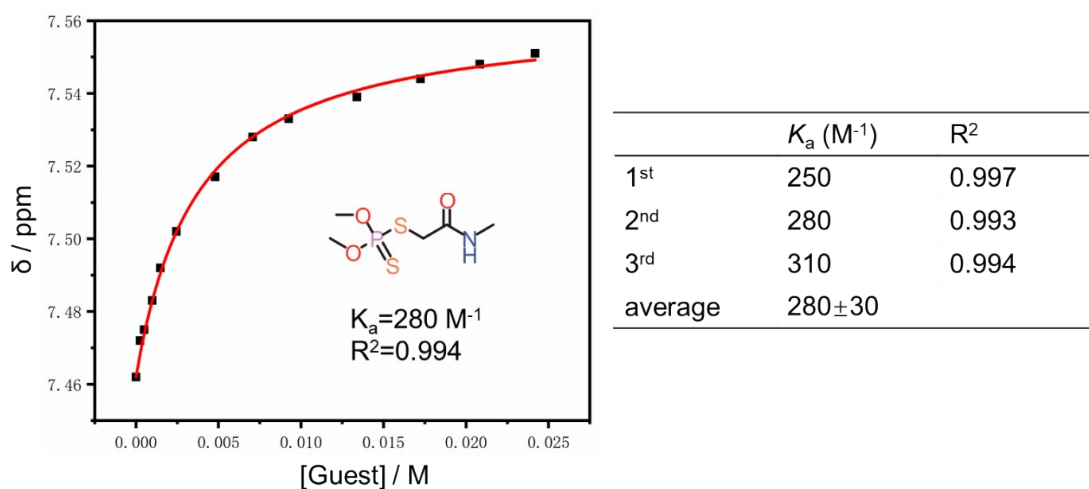

**Fig. S29** Non-linear curve-fitting and association constant for the complexation between **1b** and **5** in  $\text{D}_2\text{O}$  at 298 K.

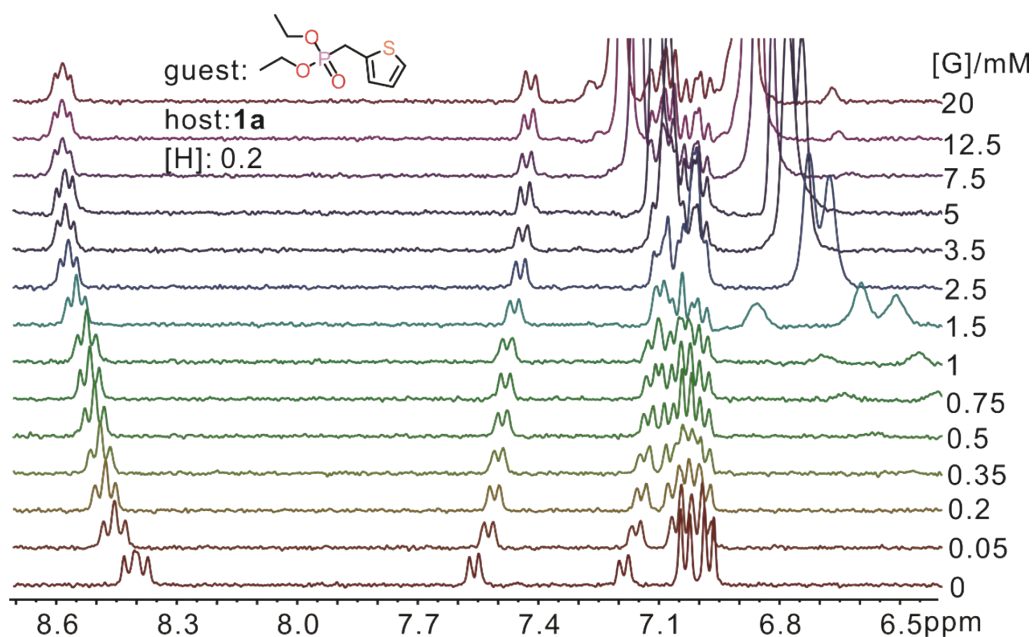

**Fig. S30** Partial  $^1\text{H}$  NMR spectra (400 MHz,  $\text{D}_2\text{O}$ , 298 K) of **1a** ( $2.0 \times 10^{-4}$  M) titrated by **6**. From bottom to top, the concentrations of **6** are in the range of  $0 \sim 2.0 \times 10^{-2}$  M. Protons (4+4') of **1a** were monitored for the calculation of binding constants. Nonlinear curve-fitting method<sup>i</sup> used here has been reported.

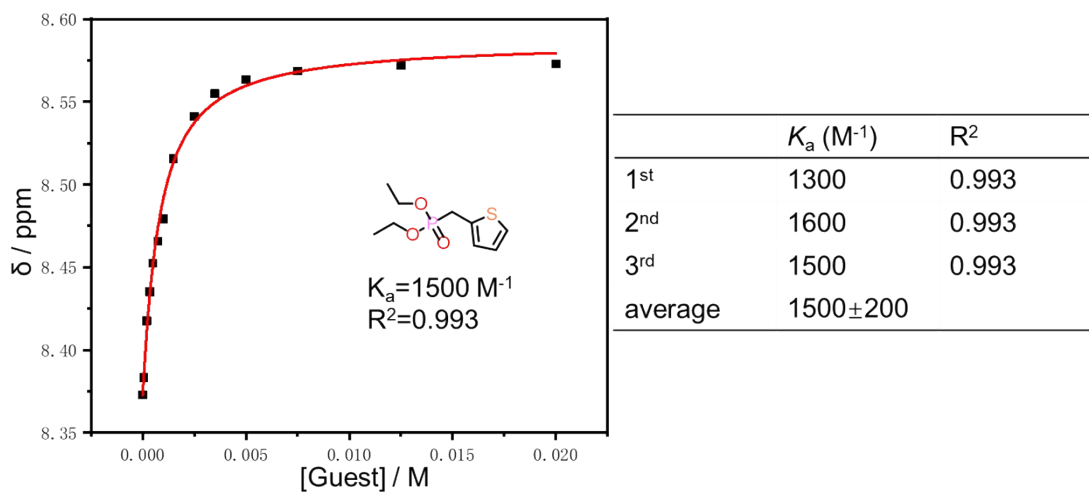

**Fig. S31** Non-linear curve-fitting and association constant for the complexation between **1a** and **6** in  $\text{D}_2\text{O}$  at 298 K.

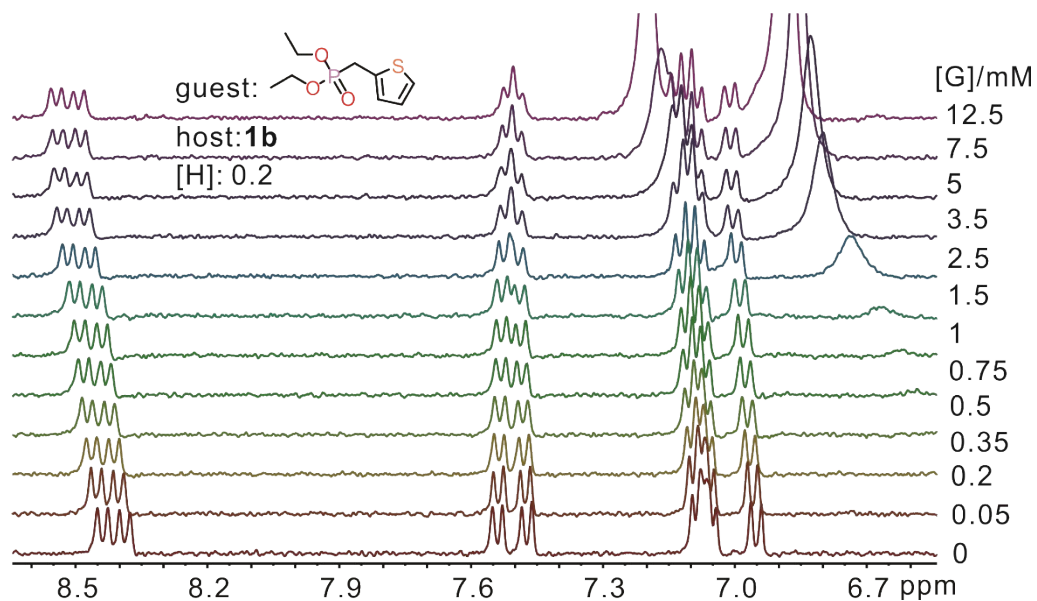

**Fig. S32** Partial  $^1\text{H}$  NMR spectra (400 MHz,  $\text{D}_2\text{O}$ , 298 K) of **1b** ( $2.0 \times 10^{-4}$  M) titrated by **6**. From bottom to top, the concentrations of **6** are in the range of  $0 \sim 1.25 \times 10^{-2}$  M. Protons (4+4') of **1b** were monitored for the calculation of binding constants.

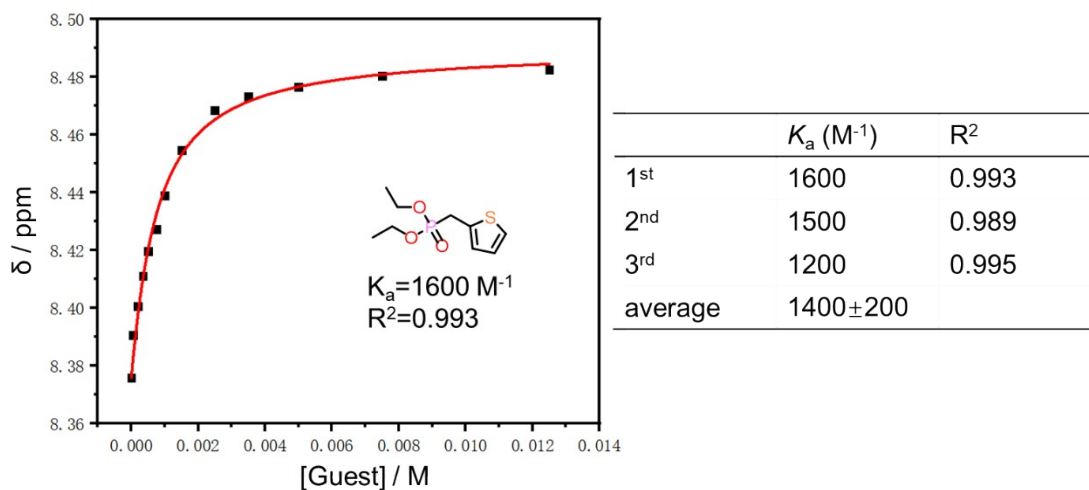

**Fig. S33** Non-linear curve-fitting and association constant for the complexation between **1b** and **6** in  $\text{D}_2\text{O}$  at 298 K.



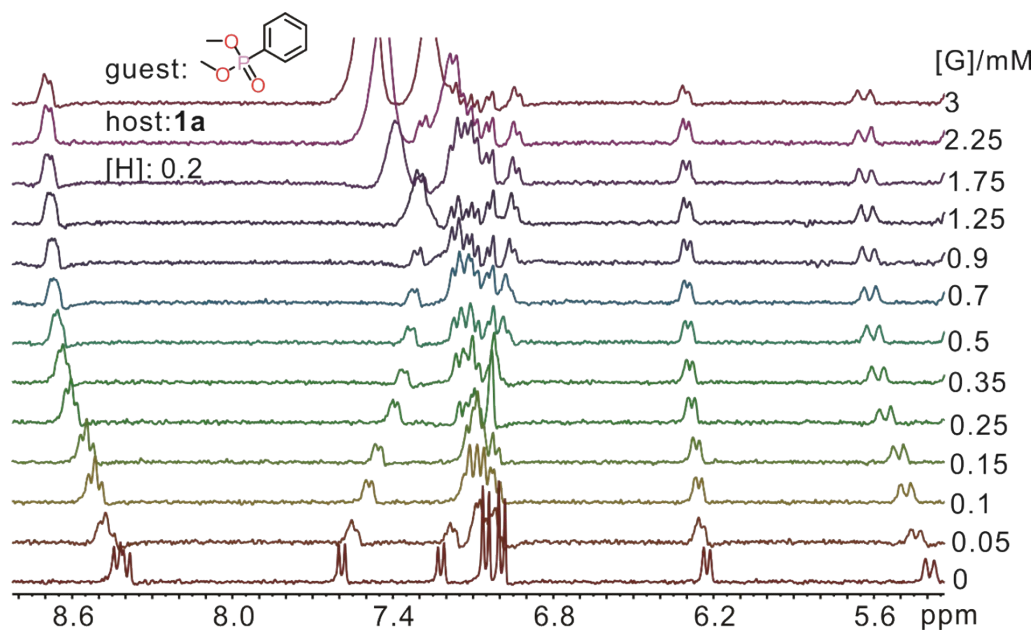

**Fig. S34** Partial  $^1\text{H}$  NMR spectra (400 MHz,  $\text{D}_2\text{O}$ , 298 K) of **1a** ( $2.0 \times 10^{-4}$  M) titrated by **7**. From bottom to top, the concentrations of **7** are in the range of  $0 \sim 3.0 \times 10^{-3}$  M. Protons ( $7+7'$ ) of **1a** were monitored for the calculation of binding constants.

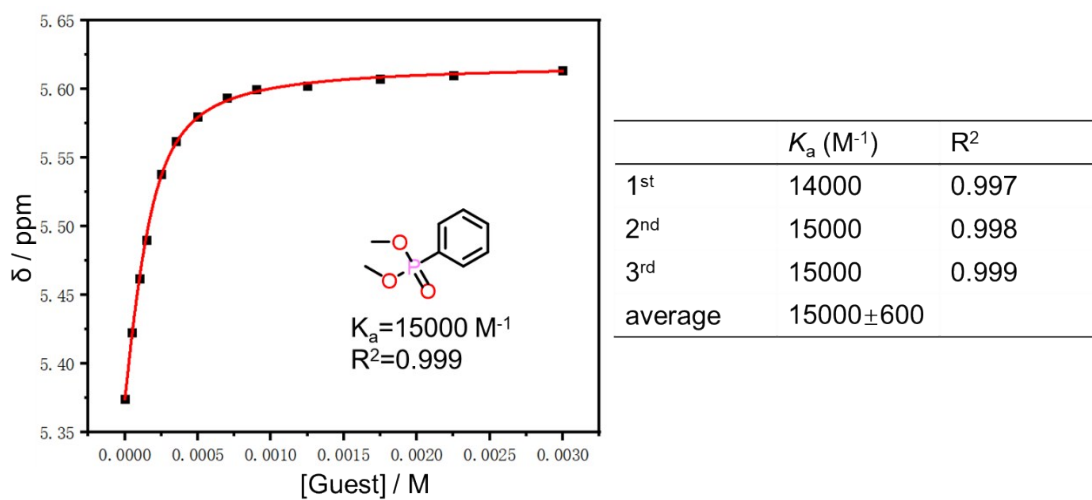

**Fig. S35** Non-linear curve-fitting and association constant for the complexation between **1a** and **7** in  $\text{D}_2\text{O}$  at 298 K.



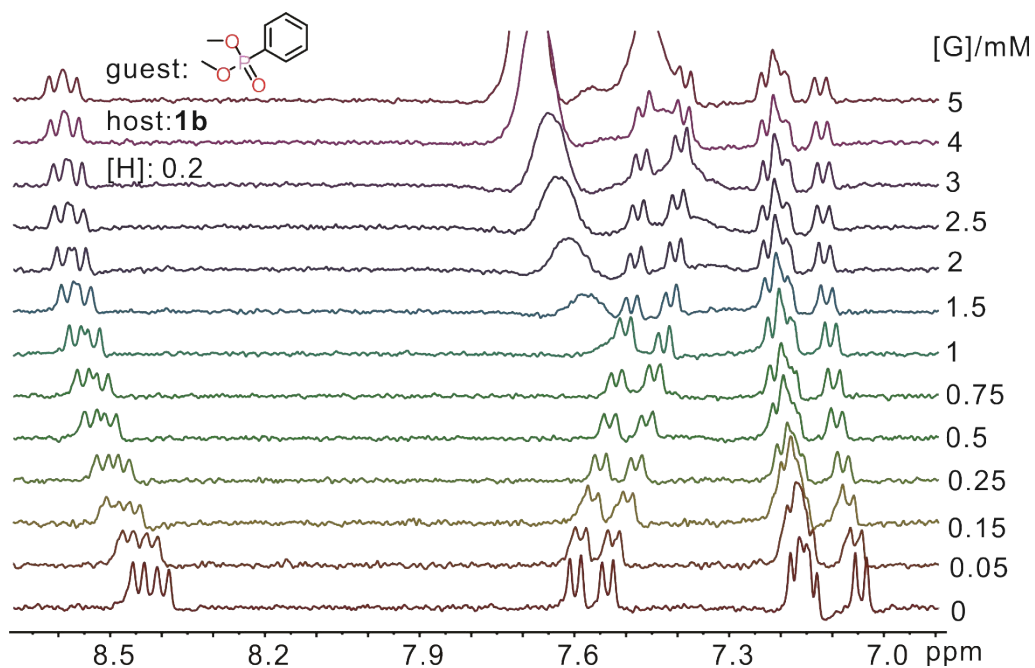

**Fig. S36** Partial  $^1\text{H}$  NMR spectra (400 MHz,  $\text{D}_2\text{O}$ , 298 K) of **1b** ( $2.0 \times 10^{-4}$  M) titrated by **7**. From bottom to top, the concentrations of **7** are in the range of  $0 \sim 5.0 \times 10^{-3}$  M. Protons ( $4+4'$ ) of **1b** were monitored for the calculation of binding constants.

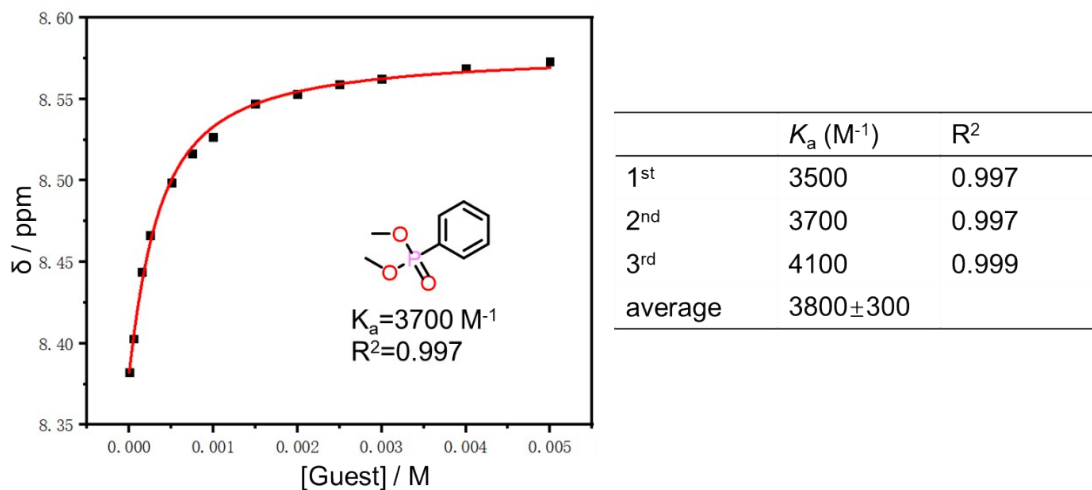

**Fig. S37** Non-linear curve-fitting and association constant for the complexation between **1b** and **7** in  $\text{D}_2\text{O}$  at 298 K.

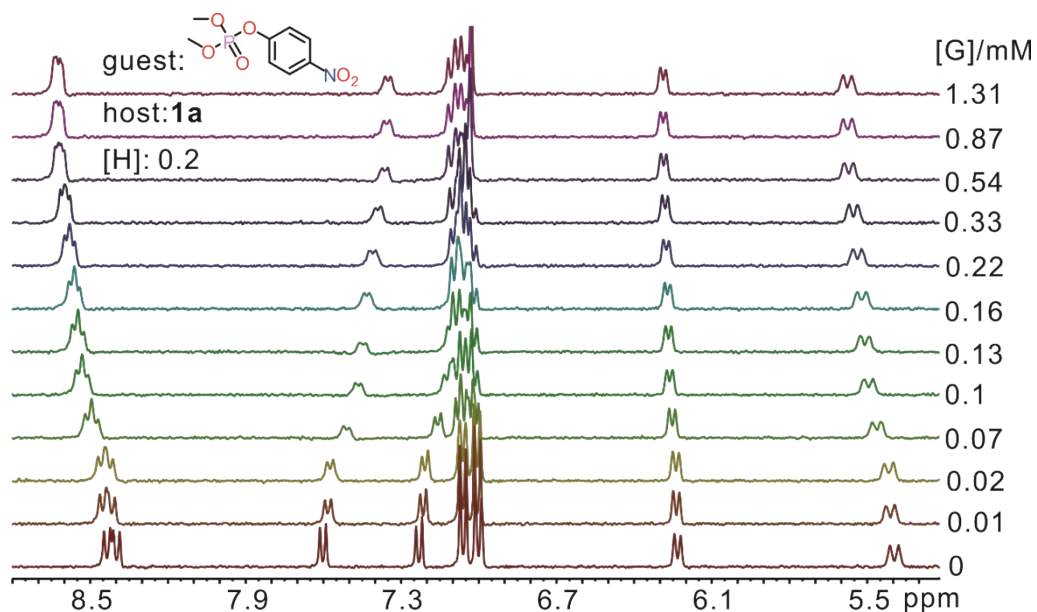

**Fig. S38** Partial  $^1\text{H}$  NMR spectra (400 MHz,  $\text{D}_2\text{O}$ , 298 K) of **1a** ( $2.0 \times 10^{-4}$  M) titrated by **8**. From bottom to top, the concentrations of **8** are in the range of  $0 \sim 1.31 \times 10^{-3}$  M. Protons ( $7+7'$ ) of **1a** were monitored for the calculation of binding constants.

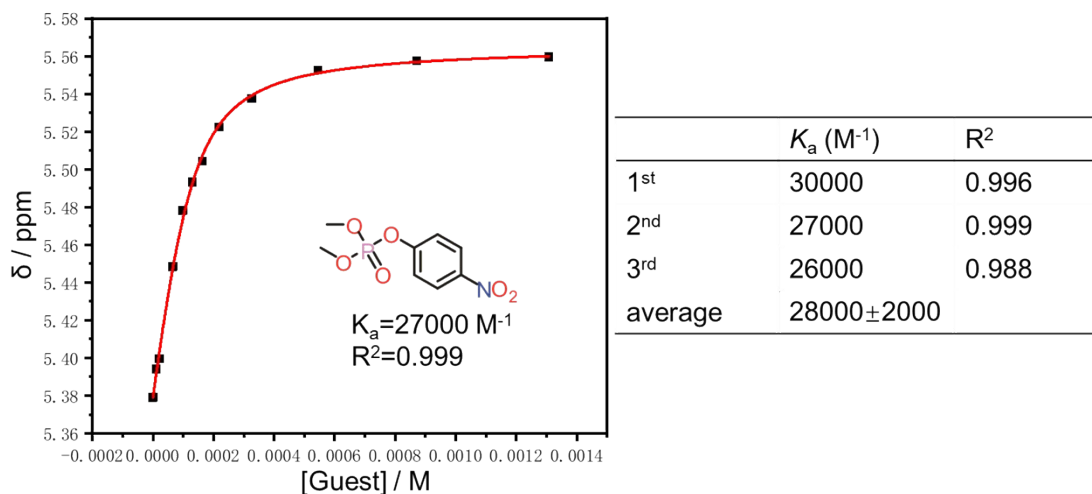

**Fig. S39** Non-linear curve-fitting and association constant for the complexation between **1a** and **8** in  $\text{D}_2\text{O}$  at 298 K.

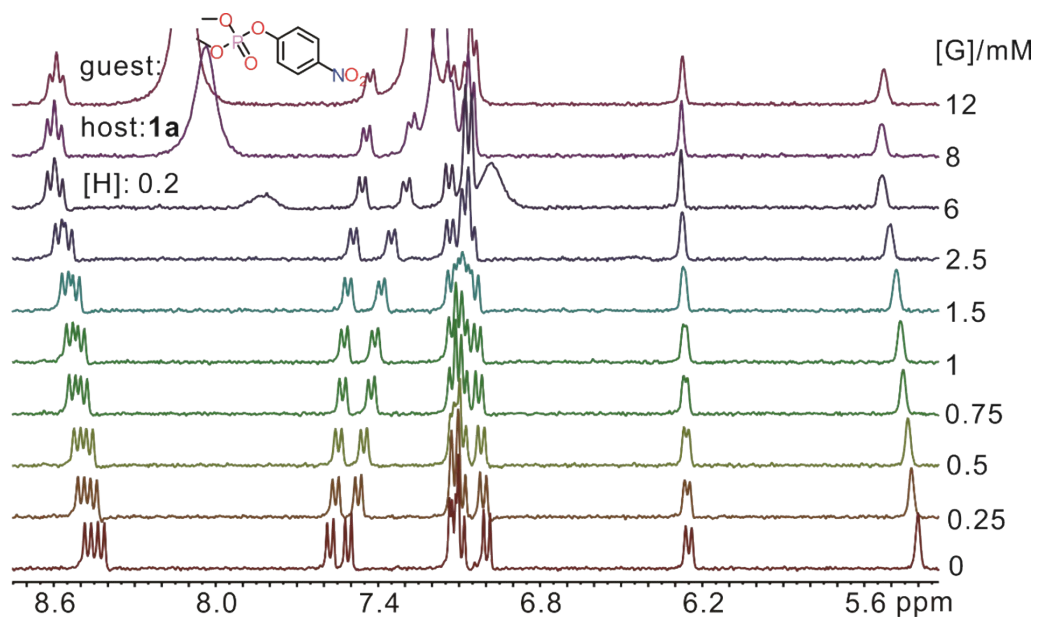

**Fig. S40** Partial  $^1\text{H}$  NMR spectra (400 MHz,  $\text{D}_2\text{O}$ , 298 K) of **1b** ( $2.0 \times 10^{-4}$  M) titrated by **8**. From bottom to top, the concentrations of **8** are in the range of  $0 \sim 1.2 \times 10^{-2}$  M. Protons ( $4+4'$ ) of **1b** were monitored for the calculation of binding constants.

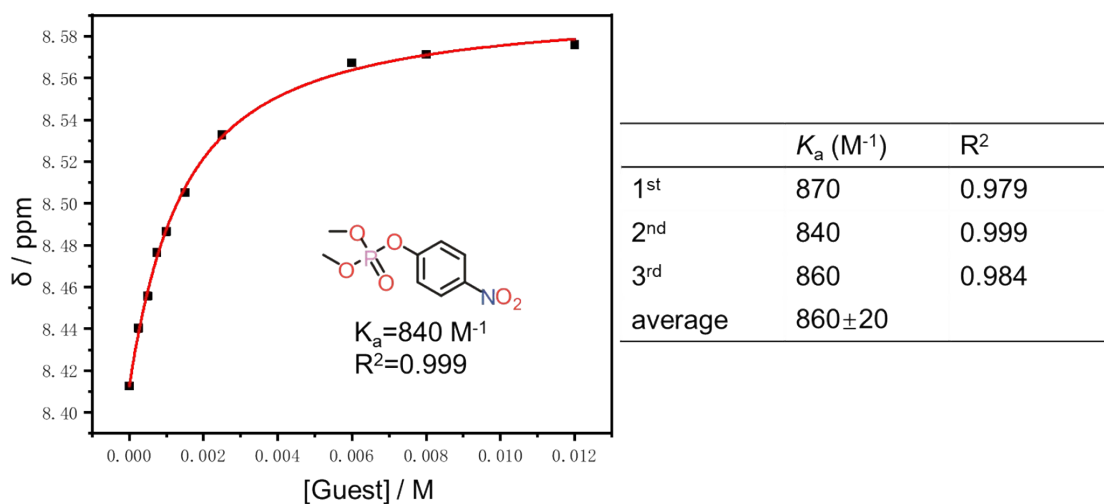

**Fig. S41** Non-linear curve-fitting and association constant for the complexation between **1b** and **8** in  $\text{D}_2\text{O}$  at 298 K.

#### 4. 9:1 H<sub>2</sub>O/D<sub>2</sub>O Titration Experiments

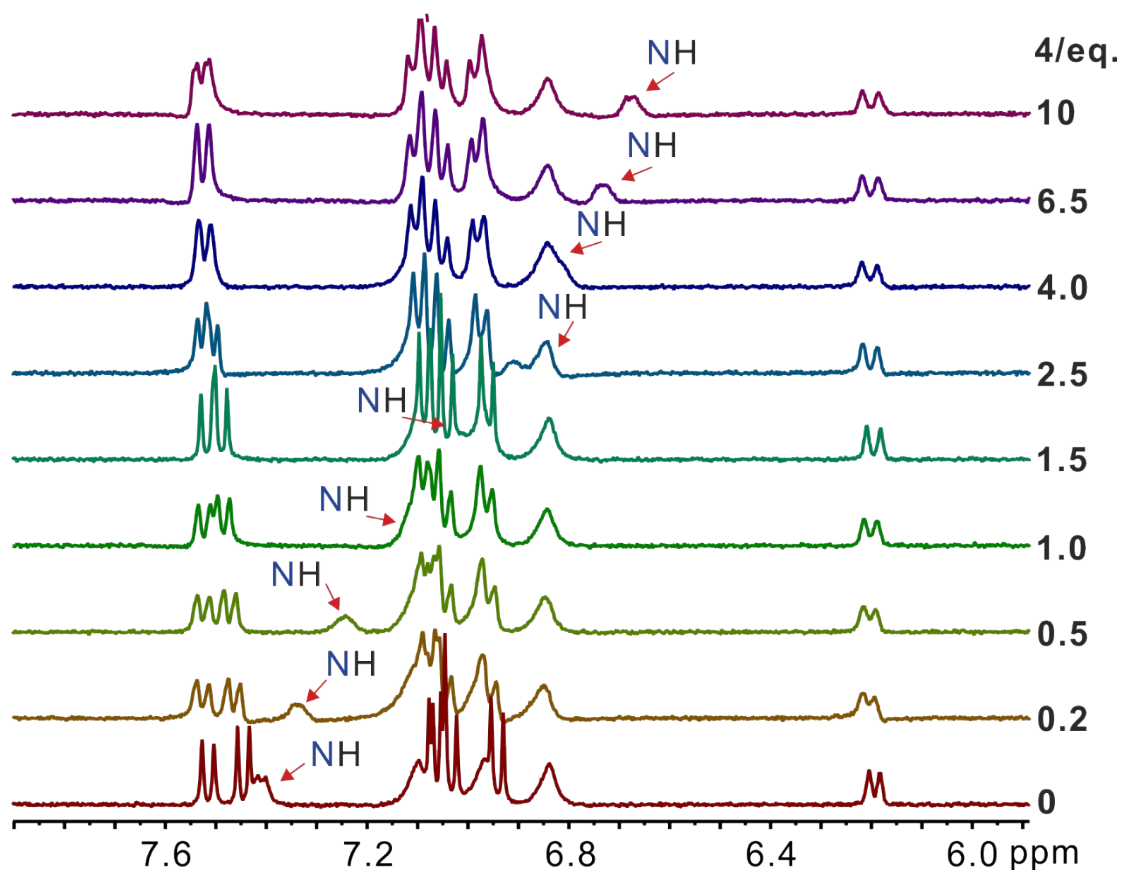

**Fig. S42** <sup>1</sup>H NMR spectra of **1b** titrated by **3** in H<sub>2</sub>O/D<sub>2</sub>O (9:1). The water peak was suppressed. The amide protons shift upfield, indicating the hydrogen bonds are weaker between the oxygen atoms of **3** and the amide protons of **1b** than those between **1b** and the encapsulated water in its free state.<sup>2</sup>

2 H. Yao, H. Ke, X. Zhang, S. J. Pan, M. S. Li, L. P. Yang, G. Schreckenbach and W. Jiang, *J. Am. Chem. Soc.*, 2018, **140**, 13466.

## 5. Fluorescence Titration Experiments

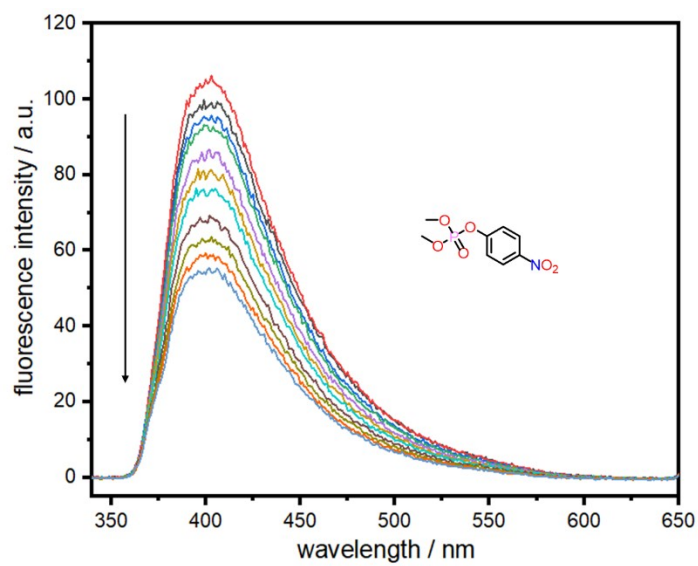

**Fig. S43** Fluorescence spectra of **1a** ( $1.0 \times 10^{-5}$  M) when titrated with **8** ( $0 \sim 2.1 \times 10^{-5}$  M) in deionized H<sub>2</sub>O at 25 °C

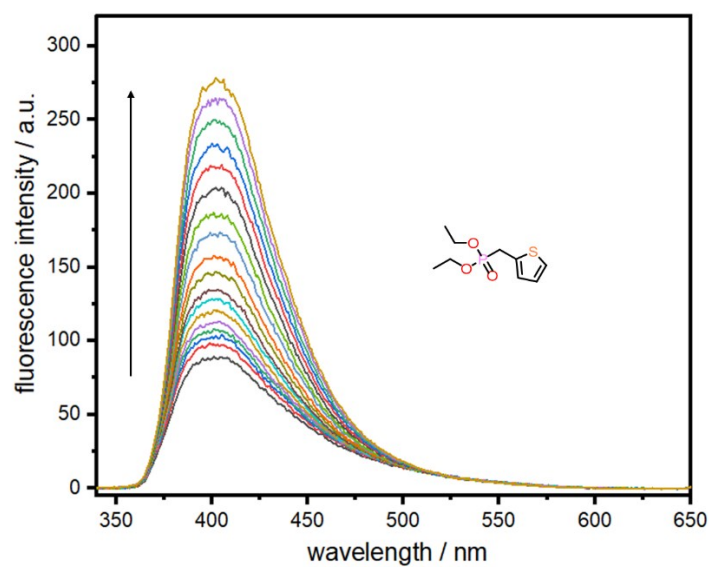

**Fig. S44** Fluorescence spectra of **1a** ( $1.0 \times 10^{-5}$  M) when titrated with **6** ( $0 \sim 4.1 \times 10^{-4}$  M) in deionized H<sub>2</sub>O at 25 °C

## 6. In vitro Enzymatic Experiments

The general method was reported by Ellman and co-workers.<sup>3</sup> The principle of this experiment is shown in Fig. S45. Acetylcholinesterase (AChE) can largely increase the hydrolysis speed of Acetylthiocholine-iodide (AICI). The hydrolysed product of AICI can generate a yellow product that have an absorption at 412 nm by reacting with 5,5'-Dithiobis(2-nitrobenzoic acid) (DTNB). Thus, we can monitor the activity of AChE by using UV-vis spectrometer.

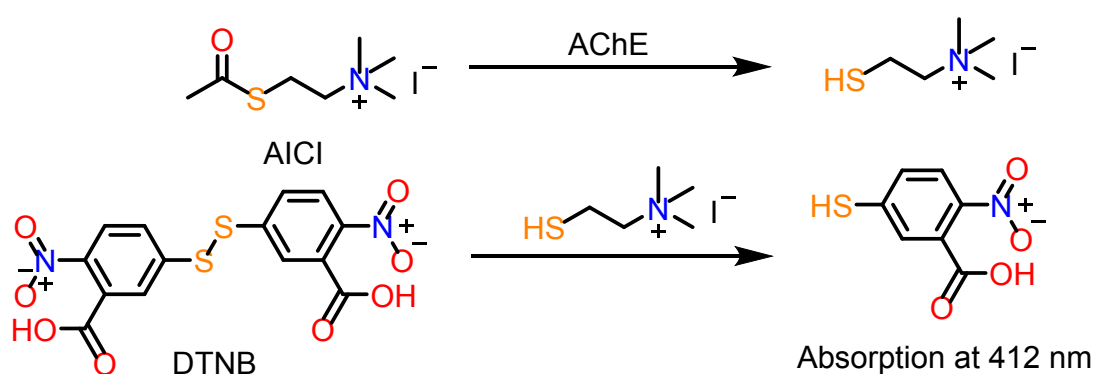

**Fig. S45** Mechanism of the Enzyme-based biomimetic experiments by substrate AICI and indicator DTNB.

AChE (200 u/g), substrate AICI, and indicator DTNB are all commercially available. 15 mM DTNB solution, 15 mM AICI solution and 0.85 u/mL AChE solution was prepared in PBS buffer (10 mM, pH = 7.2). Before the experiment, 2.65 mL PBS buffer, 50  $\mu$ L AChE ( $4.25 \times 10^{-2}$  u) and 100  $\mu$ L DTNB ( $1.5 \times 10^{-3}$  mmol) mixture was preheated under 37  $^{\circ}$ C for 10 mins. After that, 50  $\mu$ L AICI ( $7.5 \times 10^{-4}$  mmol) was injected to the mixture. The resulting solution was monitored by using UV-vis spectrometer. Molecular tube **1a** and paraoxon were added after preheated and before the injection of AICI.

<sup>3</sup> G. L. Ellman, K. D. Courtney, V. Andres Jr. and R. M. Featherstone. *Biochem. Pharmacol.*, 1961, 7, 88.

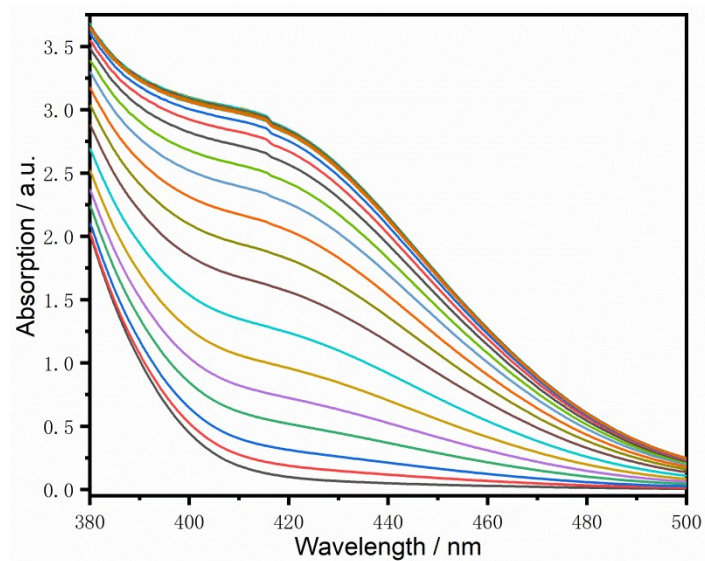

**Fig. S46** UV-vis monitoring of enzyme-based experiment at 37 °C with:  $4.25 \times 10^{-2}$  u AChE,  $1.5 \times 10^{-3}$  mmol DTNB and  $7.5 \times 10^{-4}$  mmol AICI.

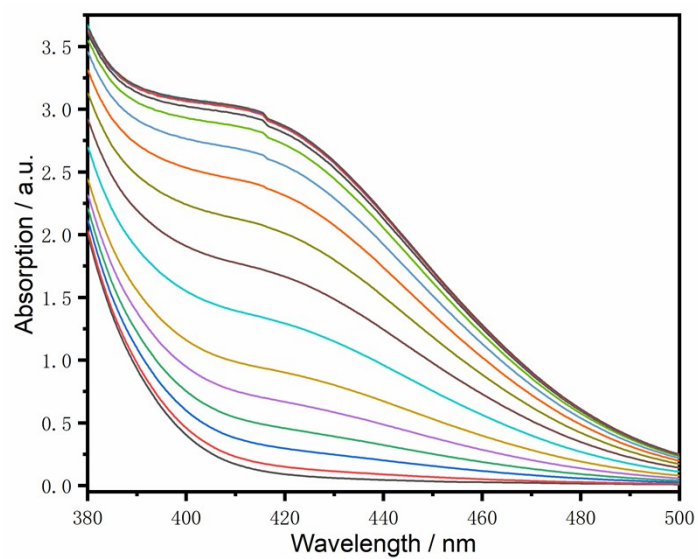

**Fig. S47** UV-vis monitoring of enzyme-based experiment at 37 °C with:  $7.5 \times 10^{-4}$  mmol **1a**,  $4.25 \times 10^{-2}$  u AChE,  $1.5 \times 10^{-3}$  mmol DTNB and  $7.5 \times 10^{-4}$  mmol AICI.



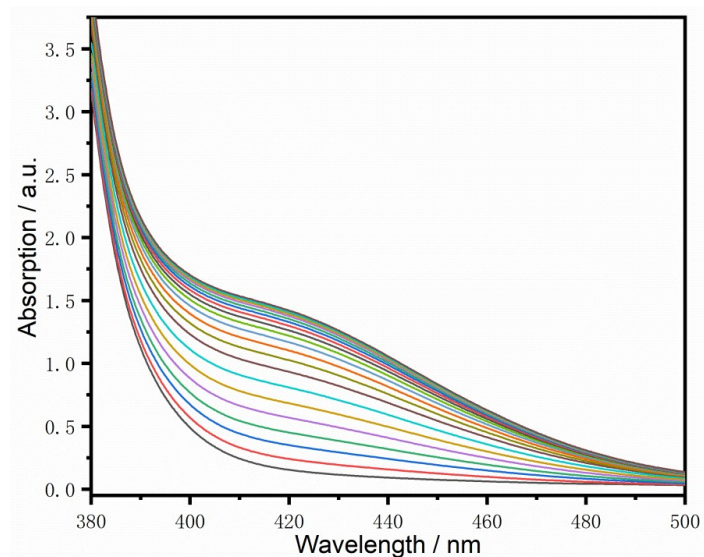

**Fig. S48** UV-vis monitoring of enzyme-based experiment at 37 °C with:  $3.75 \times 10^{-3}$  mmol **1a**,  $4.25 \times 10^{-2}$  u AChE,  $1.5 \times 10^{-3}$  mmol DTNB,  $7.5 \times 10^{-4}$  mmol AICI and  $7.5 \times 10^{-4}$  mmol paraoxon.

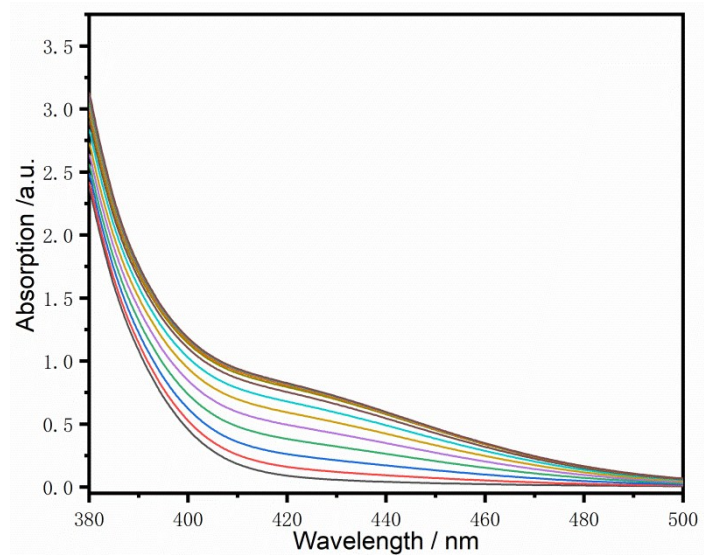

**Fig. S49** UV-vis monitoring of enzyme-based experiment at 37 °C with:  $7.5 \times 10^{-4}$  mmol **1a**,  $4.25 \times 10^{-2}$  u AChE,  $1.5 \times 10^{-3}$  mmol DTNB,  $7.5 \times 10^{-4}$  mmol AICI and  $7.5 \times 10^{-4}$  mmol paraoxon.



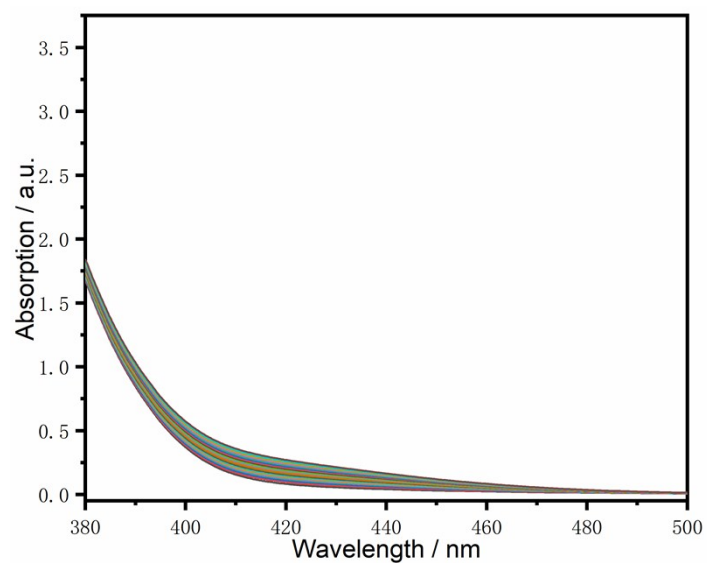

**Fig. S50** UV-vis monitoring of enzyme-based experiment at 37°C with:  $4.25 \times 10^{-2}$  u AChE,  $1.5 \times 10^{-3}$  mmol DTNB,  $7.5 \times 10^{-4}$  mmol AICI and  $7.5 \times 10^{-4}$  mmol paraoxon.

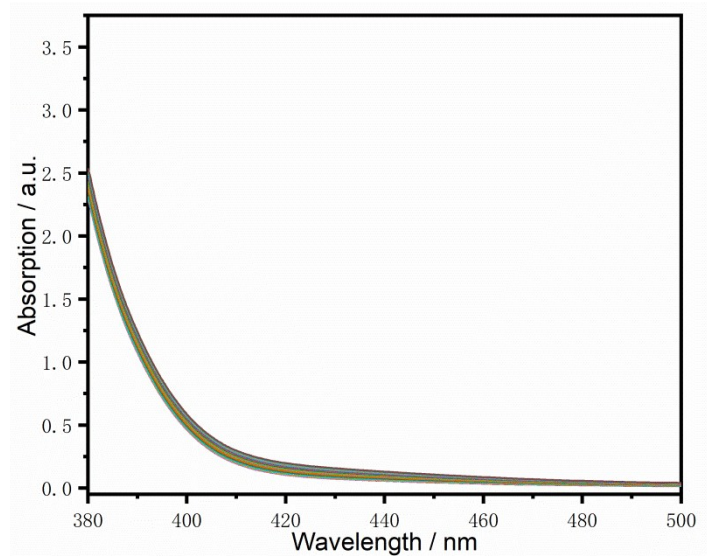

**Fig. S51** UV-vis monitoring of enzyme-based experiment at 37 °C with:  $7.5 \times 10^{-4}$  mmol **1a**,  $1.5 \times 10^{-3}$  mmol DTNB and  $7.5 \times 10^{-4}$  mmol AICI.

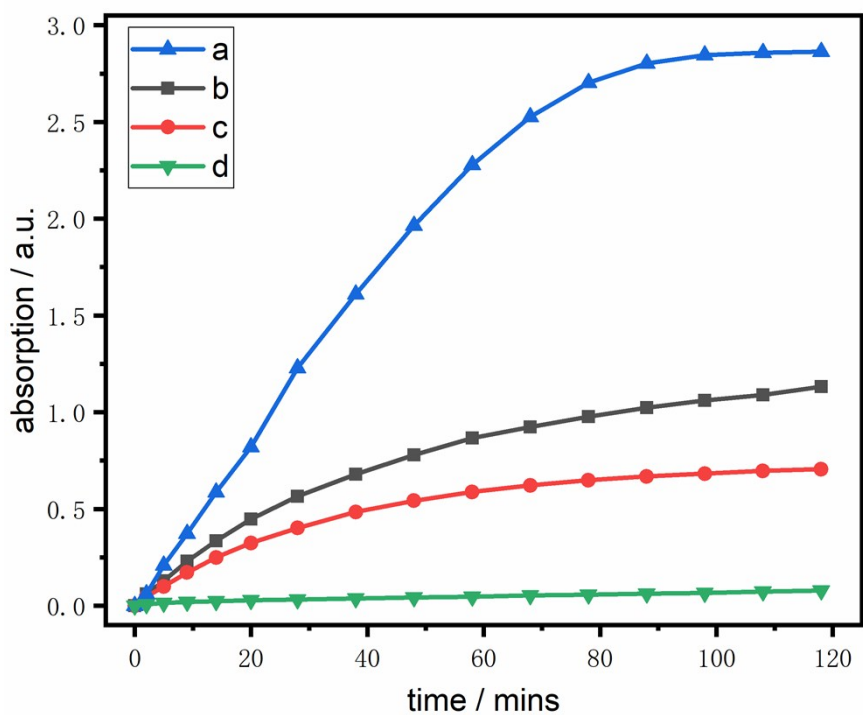

**Fig. S52** Biomimetic enzyme-based experiments (37 °C, UV-vis absorption at 412nm) for the prevention of paraoxon's toxicity to acetylcholinesterase (AChE) using molecular tube **1a**. a) AChE + substrate + indicator; b) AChE + substrate + indicator + 1 eq. paraoxon + 5 eq. **1a** (after 30 s); c) AChE + substrate + indicator + 1 eq. paraoxon + 5 eq. **1a** (after 60 s); d) AChE + substrate + indicator + 1 eq. paraoxon;

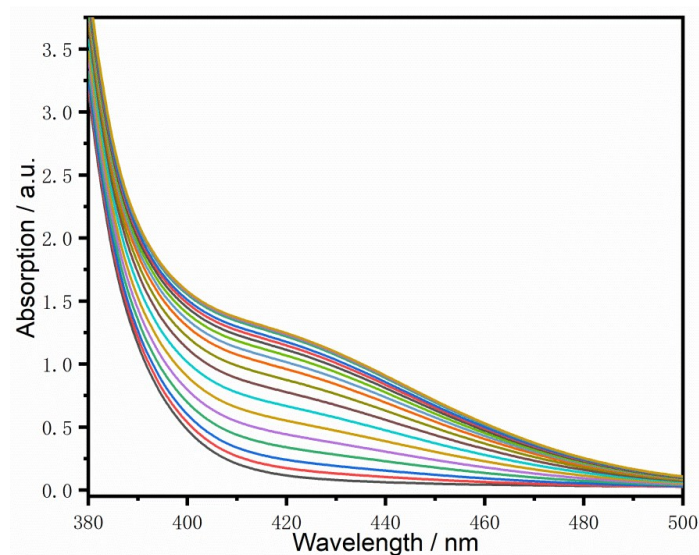

**Fig. S53** UV-vis monitoring of enzyme-based experiment at 37 °C with:  $4.25 \times 10^{-2}$  u AChE,  $1.5 \times 10^{-3}$  mmol DTNB,  $7.5 \times 10^{-4}$  mmol AICI and  $7.5 \times 10^{-4}$  mmol paraoxon.  $3.75 \times 10^{-3}$  mmol **1a** was added 30 s after the injected of paraoxon.

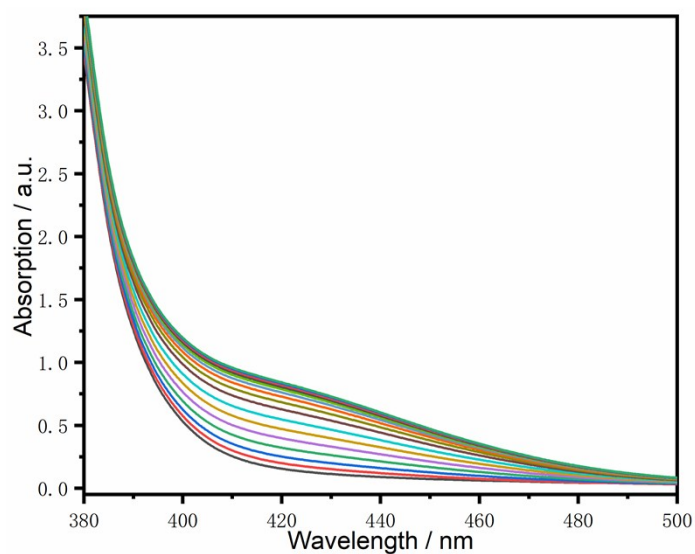

**Fig. S54** UV-vis monitoring of enzyme-based experiment at 37 °C with:  $4.25 \times 10^{-2}$  u AChE,  $1.5 \times 10^{-3}$  mmol DTNB,  $7.5 \times 10^{-4}$  mmol AICI and  $7.5 \times 10^{-4}$  mmol paraoxon.  $3.75 \times 10^{-3}$  mmol **1a** was added 60 s after the injected of paraoxon.

## 7. Binding between AICI and 1a

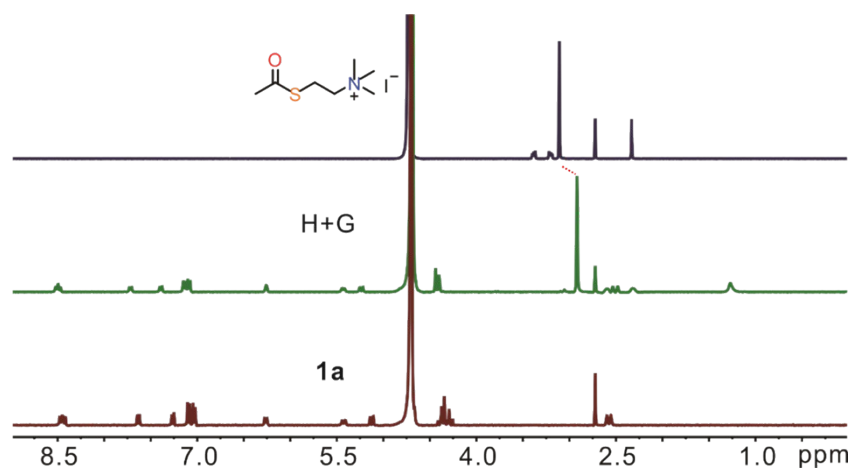

**Fig. S55** <sup>1</sup>H NMR spectra (400 MHz, D<sub>2</sub>O, 4.0×10<sup>-4</sup> M, 298 K) of (a) Guest AICI, (c) 1a and (b) their equimolar mixture. In the host-guest mixture, the protons of the guest shifted upfield, suggesting the complexation between AICI and 1a.

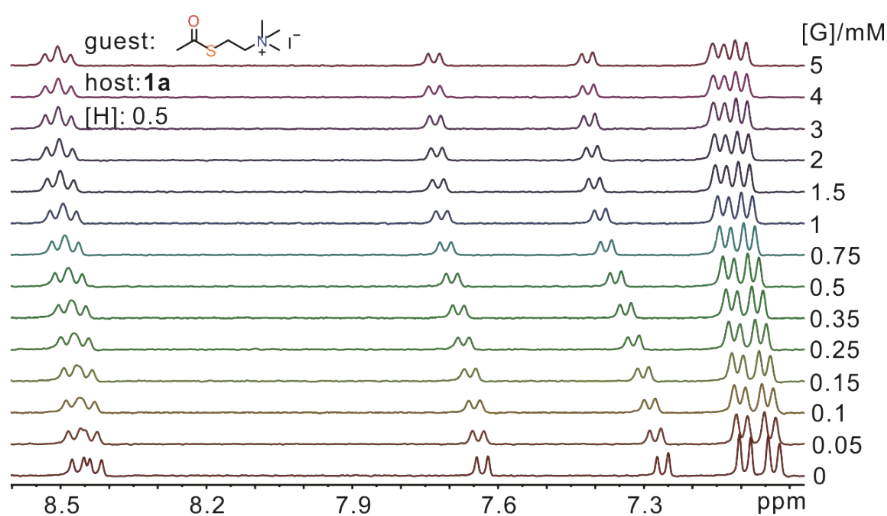

**Fig. S56** Partial <sup>1</sup>H NMR spectra (400 MHz, D<sub>2</sub>O, 298 K) of 1a (5.0×10<sup>-4</sup> M) titrated by AICI. From bottom to top, the concentrations of AICI are in the range of 0~5.0×10<sup>-3</sup> M. Protons (2') of 1a were monitored for the calculation of binding constants.

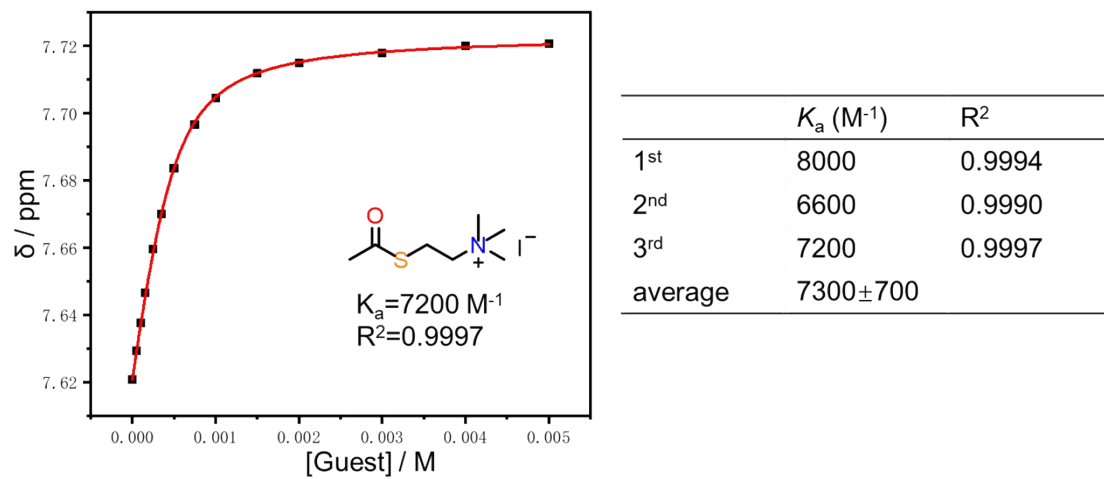

**Fig. S57** Non-linear curve-fitting and association constant for the complexation between **1a** and AICI in D<sub>2</sub>O at 298 K.
